# Supplementary material for: Stochastic processes dominate community assembly of ectomycorrhizal fungi associated with Picea crassifolia in the Helan Mountains, China
Source: Frontiers journal article supplement (doi:10.3389/fmicb.2022.1061819), 2023-01-12
Supplement: Table_1.xlsx [file Table_1.xlsx]

## Sheet: Sheet1
Table S1: Molecular identification of ectomycorrhizal fungi investigated in this study.
OTUs	ENA accession No.	Sequence	Kindom	Phylum	Class	Order	Family	Genus	EM fungal lineage	ref.UNITE+INSDC match	Evalue	Identity (%)
OU_1	OU989054	TACTCTCACACTTCTGATCCTTTGGATCGGGAGCGGTGGACTTGGGTGCTGCTGCTTTACTGTGGCTCACCTCAAATGCATTAGTGCAACTCTTGGTTGGACATAGTACGGCGTGATAAGTGTCTTCGCCGGCACCTCGCAAGAGGGTGGCTGATCAGGGCTCTGTGCTTTCCAACTGTCTTCAGACAACAACTGACA	Fungi	Basidiomycota	Agaricomycetes	Sebacinales	Sebacinaceae	Sebacina	sebacina	GU269910|k__Fungi;p__Basidiomycota;c__Agaricomycetes;o__Sebacinales;f__Sebacinaceae;g__Sebacina;s__Sebacina_sp|SH1513260.08FU	3e-100	100
OU_2	OU989055	TACTCTCACACTTCCGATCTTGCATTGGGAGCGGTGGACTTGGGTTTGCTGCTTTACCGTAGCTTACCTCAAATGGGTTAGTGCAGCTCTTGGTTGGACATAGTACGGCGTGATAAGTATCTTCGCTGGTGCCTCGCAAGAGGGTGGCCGATCGGGATGTTGTGCTCCAAACCGTCTTCGGACAATCTCTGACA	Fungi	Basidiomycota	Agaricomycetes	Sebacinales	Sebacinaceae	Sebacina	sebacina	KX510022|k__Fungi;p__Basidiomycota;c__Agaricomycetes;o__Sebacinales;f__Sebacinaceae;g__Sebacina;s__Sebacina_sp|SH1215592.08FU	2e-96	100
OU_3	OU989056	AATACCACTCAAGCTCTTCTGCTTGGTCATGGAAGAAGAGTATGCTTGCATCCTCTCTTCTGAAATCGAATGGCGGACTGCCTCATGTGCCTCGCGTAGTAAGTTCATCTTTTCGCTTGGAGTGTGAGATAGTCTCGCCATCAACCCCCATACTTCTAA	Fungi	Ascomycota	Pezizomycetes	Pezizales	Pyronemataceae	Wilcoxina	wilcoxina	UDB0749803|k__Fungi;p__Ascomycota;c__Pezizomycetes;o__Pezizales;f__Pyronemataceae;g__Wilcoxina;s__Fungi_sp|SH1557656.08FU	1e-78	100
OU_4	OU989057	TACTCTCACACTTCCGATCTTGCATTGGGAGCGGTGGACTTGGGTTTGCTGCCTTACCGTAGCTTACCTCAAATGTGTTAGTGCAACTCTTGGTTGGACATAGTACGGCGTGATAAGTATCTTCGCCGGTGCCTCGCAATTGCGAGGGTGGCCGATCGGGATGTTGTGCTCCAAACCGTCTTCGGACAATCTCTGACA	Fungi	Basidiomycota	Agaricomycetes	Sebacinales	Sebacinaceae	Sebacina	sebacina	KU924633|k__Fungi;p__Basidiomycota;c__Agaricomycetes;o__Sebacinales;f__Sebacinaceae;g__Sebacina;s__Sebacina_sp|SH1615388.08FU	3e-100	100
OU_5	OU989058	ACACCTCAACTCTCATGGTCCGCCATGACGAGCTTGGACTTTGGGGGTCTTGCCGGCCTAGCGTCGGCTCCTCTCAAATGGATCAGCTTCCCAGTGTTTGGCGGCGTCACAGGTGTGATAACTATCTACGCTTGTGGTTCTCTGCCATTAACCTTCAGCGATGGAGGTTCGCTGGAGCTCACAGATGTCTCTCCTTGAGGAGGACAGCTTTTTGAAC	Fungi	Basidiomycota	Agaricomycetes	Thelephorales	Thelephoraceae	_	tomentella-thelephora	AJ893320|k__Fungi;p__Basidiomycota;c__Agaricomycetes;o__Thelephorales;f__Thelephoraceae;g__unidentified;s__Thelephoraceae_sp|SH1502237.08FU	2e-98	96.77
OU_6	OU989059	AAATCATATCAAGCAATTTTGCATGGTCATGGAGGAAGAGTCCACCCGGTGTGGTCTCCCCGCCGAAATGCAACGGCGGAAAGTCTCTGATACTAGGCGTAGTAGTAACGTTCGCTTTGTATCCGCAGTCATTCCTGCCAGCGAAACCCCCACAATTCTCTT	Fungi	Ascomycota	Pezizomycetes	Pezizales	Pyronemataceae	Geopora	geopora	JN558642|k__Fungi;p__Ascomycota;c__Pezizomycetes;o__Pezizales;f__Pyronemataceae;g__Geopora;s__Geopora_sp|SH1573079.08FU	2e-80	100
OU_7	OU989060	AATACCTCTCAAGCAGATTTGCTTGGTCTTGGAAGATGAGTTTGCTTGCATTCTCCCTTCTGAAATTCAAAGGCGGATGATCTCATATCCCCAGGCGTAGTAAGATTATCTTTTCGCATGGTGTGTGAGATAGTCCAGCCGTCGACCCCCAATTTTTTCAA	Fungi	Ascomycota	Pezizomycetes	Pezizales	Pyronemataceae	Trichophaea	awilcoxina	FM206477|k__Fungi;p__Ascomycota;c__Pezizomycetes;o__Pezizales;f__Pyronemataceae;g__Trichophaea;s__Trichophaea_sp|SH1557659.08FU	9e-80	100
OU_8	OU989061	TACTCTCACACTTCCAATTCTTTGGATTGGGAGCGGTGGACTTGGGCGCTGCTGCTTTACTGTGGCTCACCTCAAATGCATTAGTGCAACCCTTGGTTAGACATAGTACGGCGTGATAAGTGTCTTCGCTGGCGCCTCACTTTTAGAGGGTGGCTGATCAGGGGCTCTGTGCTTCAAACCGTCTTTGGACAATGGCTGACA	Fungi	Basidiomycota	Agaricomycetes	Sebacinales	Sebacinaceae	Sebacina	sebacina	KC965251|k__Fungi;p__Basidiomycota;c__Agaricomycetes;o__Sebacinales;f__Sebacinaceae;g__Sebacina;s__Sebacina_sp|SH1561858.08FU	5e-98	99
OU_9	OU989062	ACACCTCAACTCTCGTGGTTTGCTACGATGAGCTTGGACTTTGGGGGTCTTGCTGGCCTGTGGTCGGCTCCTCTCAAATGAATCAGCTTCCCAGTGTTTGGTGGCGTCGCAGGTGTGATAACTATCTACGCTTGTGGTTTTCCACCAGATAACCTTCAGTGATGGAGGTTCGCTGGGGCTCATAAACGTCTTTCCTCAGTGAAGACAGCTTTTTGAAC	Fungi	Basidiomycota	Agaricomycetes	Thelephorales	Thelephoraceae	_	tomentella-thelephora	EF218826|k__Fungi;p__Basidiomycota;c__Agaricomycetes;o__Thelephorales;f__Thelephoraceae;g__unidentified;s__Thelephoraceae_sp|SH1502204.08FU	3e-111	100
OU_10	OU989063	TACTCTCACACTCTCAAATTAGAGAGCGGTGGACTTGGATGTTGCCTGGTACTTGCTGTCAGGCTCGTCTAAAATGAGTTAGTACGACTCCTAGTTAAACATAGTACGGCGTTATAACTAAACCCTCGCTGTTTTCTGTCTGATTAGGAGCTCTGTGCTTCCAACCGTCTTCGGACAATATTTGATA	Fungi	Basidiomycota	Agaricomycetes	Sebacinales	Sebacinaceae	Helvellosebacina	sebacina	JX625329|k__Fungi;p__Basidiomycota;c__Agaricomycetes;o__Sebacinales;f__Sebacinaceae;g__Helvellosebacina;s__Helvellosebacina_sp|SH1556814.08FU	4e-94	100
OU_11	OU989064	AGACGATTTTCAAGCTCTTTTTGCTTGGTTCTGACGGTTGAGTGTTGCCCTTGTACTCATTCACCTTTGAAATTTACTGGCGGACTGCTTCGTGTTCCTTTTAGCGTTATAGGATAACTCTTTCGCTTGGACTCGGTGGCTCGTCCTGCCCCAAAACCCCCAACTATTTTGA	Fungi	Ascomycota	Pezizomycetes	Pezizales	Pyronemataceae	Otidea	otidea	KM010095|k__Fungi;p__Ascomycota;c__Pezizomycetes;o__Pezizales;f__Pyronemataceae;g__Otidea;s__Otidea_mirabilis|SH1614359.08FU	3e-74	95.95
OU_12	OU989065	ACACCTCAACTCTCGTGGTCCGCCATGATGAGCTTGGACTTTGGGGGTCTTGCTGGCCTAGTGTCGGCTCCTCTCAAATGGATCAGCTTGCCAGTGTTTGGTGGCGTCGCAGGTGTGATAACTATCTACGCTTGTGGTTCTCTGCCATGTAACCTTCAGTGATGGAGGTTCGCTGGAGCTCACAGATGTCTCTCCTGGGAGGACAGCTCTTTGAAC	Fungi	Basidiomycota	Agaricomycetes	Thelephorales	Thelephoraceae	_	tomentella-thelephora	JX630842|k__Fungi;p__Basidiomycota;c__Agaricomycetes;o__Thelephorales;f__Thelephoraceae;g__unidentified;s__Thelephoraceae_sp|SH1502214.08FU	3e-105	98.61
OU_13	OU989066	ACACCTCAACTCTTTATGGTCTTCCATGATGAGCTTGGACTTTGGGGGGTTTTGCTGGCCTGCAGTCAGCTCCTCTAAAATGAATCAGCTTGCCGGTGTTTGGTGGGTATCATGGGTGTGATAACTATCTACGCTCGTGGTTTTCCACCAGGTAACCTTCAGCAGTGGAGGTTCACTGGAAGCTCATAGATGTCTCTCCTCAGTGAGGACAGCCCTTTGAAT	Fungi	Basidiomycota	Agaricomycetes	Thelephorales	Thelephoraceae	_	tomentella-thelephora	LC035301|k__Fungi;p__Basidiomycota;c__Agaricomycetes;o__Thelephorales;f__Thelephoraceae;g__unidentified;s__Thelephoraceae_sp|SH1528462.08FU	3e-106	98.2
OU_14	OU989067	ACACCTCAACTCTCATGGCTTGCCATGATGAGCTTGGACGATGGGGGTCTTGCTGGCCTGTGGTCAGCTCCTCTCAAATAAATCAGCTTGCCAGTGTTTGGTGGCGTCACAGGTGTGATAACTATCTACGCTTGTGGTTTTCCACTAGGTAACCTTTGGCAACAGAGGTTCGCTGGGGCTTATAAAGGTCTCTCCTCGGTGAGGGACAGCTCTTTGAAC	Fungi	Basidiomycota	Agaricomycetes	Thelephorales	Thelephoraceae	_	tomentella-thelephora	KY684674|k__Fungi;p__Basidiomycota;c__Agaricomycetes;o__Thelephorales;f__Thelephoraceae;g__unidentified;s__Thelephoraceae_sp|SH1502475.08FU	3e-110	99.54
OU_15	OU989068	TACTTCTCACACTTCTGATCTTTTGGGTCGGGAGCGGTGGACTTGGGTGTTGCTGCTTTACTGTGGCTCACCTCAAATGCATTAGTGCAACTCTTGGTTGGACATAGTACGGCGTGATAAGTATCTTCGCCGGCACCTCGCAAGAGGGTGGCTGATCAGGAGCTCTGTGCTTTCCAACTGTCTTCAGACAACAACTGACA	Fungi	Basidiomycota	Agaricomycetes	Sebacinales	Sebacinaceae	Sebacina	sebacina	KC986244|k__Fungi;p__Basidiomycota;c__Agaricomycetes;o__Sebacinales;f__Sebacinaceae;g__Sebacina;s__Sebacina_sp|SH1561861.08FU	4e-99	99.5
OU_16	OU989069	TACTCTCACACTTCCAATCTTTGGATTGGGAGCGGTGGACTTGGGTGTTGCTGCTTACTGTGGCTCACCTCAAATCGATTCGTGCACCTCTTGGTTGGACATAGTACGGCGTGATAAGTGTCTTCGCCGGCACCTCAGTAGAGGGTGGCTGATCGGGAGCTCTGTGCTTCAAACCGTCCTCGGACAACAACTGACA	Fungi	Basidiomycota	Agaricomycetes	Sebacinales	Sebacinaceae	Sebacina	sebacina	JQ318659|k__Fungi;p__Basidiomycota;c__Agaricomycetes;o__Sebacinales;f__Sebacinaceae;g__Sebacina;s__Sebacina_sp|SH1561874.08FU	4e-99	100
OU_17	OU989070	TAACCCCTCAAGCTCAGCTTGGTGTTGGGGCCTGCCGTCTGGCAGCCCTTAAAATCAGTGGCGGTGCCATCTGGCTCTAAGCGTAGTAATTTTTCTCGCTACAGAGTTCTGGTGGATGCTTGCCATCAACCCCCAATTTTCTAT	Fungi	Ascomycota	Leotiomycetes	Helotiales	_	_	helotiales1	AJ292198|k__Fungi;p__Ascomycota;c__Leotiomycetes;o__Helotiales;f__unidentified;g__unidentified;s__Helotiales_sp|SH1564443.08FU	2e-70	100
OU_18	OU989071	TACTCTCACACTCCCGATCTTTGCATTGGGAGCAGTGGACTTGGGTTTGCTGCTTCACCGTCGCTTACCTCAAATAGGTTAGTGCAACTCTTGGTTGGACATAGTACGGCGTGATAAGTGTTCTTCGCCGGTGCCTCGCAAAGAGGGTGGCCGATCGGGATGTTGTGCTCCAAACCGTCTTCGGACAATCTCTGACA	Fungi	Basidiomycota	Agaricomycetes	Sebacinales	Sebacinaceae	Sebacina	sebacina	LC013793|k__Fungi;p__Basidiomycota;c__Agaricomycetes;o__Sebacinales;f__Sebacinaceae;g__Sebacina;s__Sebacina_sp|SH1615401.08FU	4e-99	100
OU_19	OU989072	ACACCTCAACTCTCATGGTTTGCCATGATGAGCTTGGACTTTGGAGGTCTTGCTGGCCTGTGGCCGGCTCCTCTCAAATGGATCAGCTTGCCAGTGTTTGGTGGCATCATGGGTGTGATAACTATCTACGCCTGTGGTTTTCTACCAGATAACCTTCAGTGATGGAGGTACGCTGGAGCTCATAAATGTCTCTCCTCAGTGAAGACAGCTTTTTGAAC	Fungi	Basidiomycota	Agaricomycetes	Thelephorales	Thelephoraceae	_	tomentella-thelephora	EU668208|k__Fungi;p__Basidiomycota;c__Agaricomycetes;o__Thelephorales;f__Thelephoraceae;g__unidentified;s__Thelephoraceae_sp|SH1502197.08FU	6e-108	99.08
OU_20	OU989073	TAACCCCTCAAGCTCTGCTTGGTGTTGGGGCCTGCCGTCTGGCAGCCCTTAAAATCAGTGGCGGTGCCATCTAGCTCTAAGCGTAGTAATTTTTCTCGCTATAGAGTCCCGGTGGATGCTTGCCATTAACCCCCAATTTTCTAT	Fungi	Ascomycota	Leotiomycetes	Helotiales	_	_	helotiales1	MK544026|k__Fungi;p__Ascomycota;c__Leotiomycetes;o__Helotiales;f__unidentified;g__unidentified;s__Helotiales_sp|SH1564495.08FU	2e-70	100
OU_21	OU989074	TACTCTCACACTCTCTAATTAGTAATTAGTTAGAGAGCGGTGGACTTGGATGCTGCCTGGTACTTACTGTCAGGCTCATCTAAAATGAATTAGTGCGACTCCTAGTTAAACATAGTACGGCGTGATAAGTAAACCCTCGCTGTTTTTTGGTTGATTAGGAGCTCTGTGCTTCAAACCGTCTCAGGACAATGTCTGATA	Fungi	Basidiomycota	Agaricomycetes	Sebacinales	Sebacinaceae	Helvellosebacina	sebacina	UDB025925|k__Fungi;p__Basidiomycota;c__Agaricomycetes;o__Sebacinales;f__Sebacinaceae;g__Helvellosebacina;s__Helvellosebacina_sp|SH1556819.08FU	3e-100	100
OU_22	OU989075	ATATATCAACCTTCTTTGGTTGGATGTGGGTTTGCTGGCCTCCCCGAGGTCAGCTCCCCTTAAATGCATTAGCGGACAACATTTTGCCAACTGTTCATTGGTGTGATAATTATCTACGCTATTGACGTGAAGCAATGTTCAGCTTCTAACAGTCCATTGACTTGGACAAATTTACTTTTATTA	Fungi	Basidiomycota	Agaricomycetes	Agaricales	Cortinariaceae	Cortinarius	cortinarius	MK512081|k__Fungi;p__Basidiomycota;c__Agaricomycetes;o__Agaricales;f__Cortinariaceae;g__Cortinarius;s__Cortinarius_sp|SH1141752.08FU	6e-92	100
OU_23	OU989076	ACACCTCAACTCTCACGGTTCGCCGTGATGAGCTTGGACTTTGGGGGTCTTGCTGGCCTATGGTCGGCTCCTCTCAAACGAATCGGCTTGCCAGTGTTTGGTGGCATCACGGGTGTGATAATTATCTACGCTTGTGGTTCCCCACCAGGTAACCTCCAGCGATGGAGGTCCGCTGGGGCTCATAAACGTCTCTCCGCAGCGAGGACAGCTTTTTGAAC	Fungi	Basidiomycota	Agaricomycetes	Thelephorales	Thelephoraceae	_	tomentella-thelephora	KF000534|k__Fungi;p__Basidiomycota;c__Agaricomycetes;o__Thelephorales;f__Thelephoraceae;g__unidentified;s__Thelephoraceae_sp|SH1502330.08FU	4e-89	94.04
OU_24	OU989077	AACTCTCAAACAAGATAGATTTATTTCTAGTCTCTGTTTGGATTTGGACTCTGCTGTGTCAATGCGGCTAGTCTTAAATGTATTAGCTGGTCCAAGTGAAGGTTTGGTTCTACTCAGCATGATAATTATCTGGTGTTGAGGACAGTCTCAGGACTGGCCAGACTCTCTCTGGATTGCTTCTAATCGTCTTTGGACAATTGCTCAAT	Fungi	Basidiomycota	Agaricomycetes	Cantharellales	_	_	cantharellus	UDB008733|k__Fungi;p__Basidiomycota;c__Agaricomycetes;o__Cantharellales;f__unidentified;g__unidentified;s__Cantharellales_sp|SH2713317.08FU	5e-103	99.51
OU_25	OU989078	TACTCTCACACTCTCCGATCCTATGGATTCGGGGAGCGGTGGACTTGGGTGTTGCTGCCTTTCCTTGTGGCTCACCTCAAATGCGTCAGTGCACCTCTTGGTTGGACATAGTACGGCGTGATAAGTGTCTTCGCCGGCACCTCGCAAGAGGGTGGCCGATCGGGAGCTCTGTGCTTTCAAACCGTCTTCGGACAATTTCTGACA	Fungi	Basidiomycota	Agaricomycetes	Sebacinales	Sebacinaceae	Sebacina	sebacina	KF000529|k__Fungi;p__Basidiomycota;c__Agaricomycetes;o__Sebacinales;f__Sebacinaceae;g__Sebacina;s__Sebacina_sp|SH1561854.08FU	3e-100	99.02
OU_26	OU989079	AAACTCTCAAACCACATCATTCGTTTGACGTGGCTTTGGACGTGGGGGTTTGCCGGGCTCTTCTTCTCAGCTCCCCTGAAATGCATTAGTGGTATCTGGAGCGGAAAACCGCTAGGTGTGATAAATACTGTCTATGCCTTTGGTTATGCCGTGTGTGCTGCTTCCCAACGCAACATTTATTTGACAA	Fungi	Basidiomycota	Agaricomycetes	Agaricales	Inocybaceae	Inocybe	inocybe	HG796970|k__Fungi;p__Basidiomycota;c__Agaricomycetes;o__Agaricales;f__Inocybaceae;g__Inocybe;s__Inocybe_nitidiuscula|SH1547279.08FU	4e-94	100
OU_27	OU989080	AATTCTCAACCCCACCGATTTGTTTTGGGGGGATTGGACTTGGAGCGTGCTGGCGAAGGTCGGCTCCTCTTTAAATGCATCAGTGGAGAGAAACTTGCCCCAGTGTGATAATCCTGTTGCGCTGCGGTGGGCGAAAGTCTGCTTCCAACCGTCCTCCGGGACATACGCCATCTTTA	Fungi	Basidiomycota	Agaricomycetes	Atheliales	Atheliaceae	Amphinema	amphinema-tylospora	FJ803931|k__Fungi;p__Basidiomycota;c__Agaricomycetes;o__Atheliales;f__Atheliaceae;g__Amphinema;s__Amphinema_sp|SH1648320.08FU	1e-84	98.86
OU_28	OU989081	TACTCTCACACTCTCTGATCCTTTGGATTTGGGGAGCGGTGGACTTGGGTGCTTGCTGCTTCCTTGTGGCTCACCTGAAATGTGTCAGTGCATCTCTTGATTGGACATAGTACGGCGTGATAAGTGTCTTCGCCGGCACCTCGTAAGAGGGTGGCTGATCGGGAGCCCTGTGCTTTCAAACTGTCTTCGGACAATCCCTGACA	Fungi	Basidiomycota	Agaricomycetes	Sebacinales	Sebacinaceae	_	sebacina	KY684554|k__Fungi;p__Basidiomycota;c__Agaricomycetes;o__Sebacinales;f__Sebacinaceae;g__unidentified;s__Sebacinaceae_sp|SH1561864.08FU	2e-96	98.03
OU_29	OU989082	AATTCTCAACCTTTTCAGCTTTTTCTGTTGATCAGGCTTGGATGTGGGAGTATGCGGGCTTCTCAGAAGTCGGCTCTCCTGAAATGCATTAGCGGGACCTTTGTTGCCTTGCTTTGGTGTGATAATTATCTACGCCATTTGTGAAGAGCAGCTTTATAAATGGGGTTCAGCTTCTAAAGGGTCTCTTTTGAGACAGCTTCTGACA	Fungi	Basidiomycota	Agaricomycetes	Agaricales	Tricholomataceae	Tricholoma	tricholoma	MF034240|k__Fungi;p__Basidiomycota;c__Agaricomycetes;o__Agaricales;f__Tricholomataceae;g__Tricholoma;s__Tricholoma_bonii|SH1647746.08FU	4e-104	100
OU_30	OU989083	CACCACTCAAGCCTGGCTTGGTGTTGGGCGACGTCCCCTTTGGGGACGCGCCTCGAAACGCTCGGTGGCGTGGCACCGGCTTTAAGCGTAGCAGAATCTTTCGCTTCAAAAGTCGGGGCCCCGTCTGCCGGAAGACCTACTCGCAA	Fungi	Ascomycota	Dothideomycetes	Mytilinidales	Gloniaceae	Cenococcum	cenococcum	KC967393|k__Fungi;p__Ascomycota;c__Dothideomycetes;o__Mytilinidales;f__Gloniaceae;g__Cenococcum;s__Cenococcum_geophilum|SH1639590.08FU	2e-71	100
OU_31	OU989084	ACACCTCAACTCTCATGGTTTGCCATGTTGAGCTTGGACTATGGGGGTCTTGCTGGCCTGTGGTCGGCTCCTCTCAAATGAATCAGCTTACCAGTGTTTGGTGGCATCACAGGTGTGATAACTATCTACGCTTGTGGTTTTCCACCAGGTAACCTTCAGCAATGGAGGTTCGCTGGGGCTCATAAATGTCTCTCCTCGGTGAGGACAGCTCTTTGAAC	Fungi	Basidiomycota	Agaricomycetes	Thelephorales	Thelephoraceae	Tomentella	tomentella-thelephora	KJ769318|k__Fungi;p__Basidiomycota;c__Agaricomycetes;o__Thelephorales;f__Thelephoraceae;g__Tomentella;s__Tomentella_sp|SH1159586.08FU	6e-103	97.71
OU_32	OU989085	ACACCTCAACTCTCATGGTTTGCCATGATGAGCTTGGACTTTGGGGGTCTTGCTGGCCTGTGGTCGGCTCCTCTCAAATGAATCAGCTTGCCAGTGTTTGGTGGCATCGCGGGTGTGATAACTATCTACGCTTGTGGTTTTCCGCCAGATAACCTTCAGTGACATGGAGGTTTGCTGGAGCTCATAAACGTCTCTCCCCAGCGAAGACAGCTTTGTGAAC	Fungi	Basidiomycota	Agaricomycetes	Thelephorales	Thelephoraceae	Tomentella	tomentella-thelephora	UDB026404|k__Fungi;p__Basidiomycota;c__Agaricomycetes;o__Thelephorales;f__Thelephoraceae;g__Tomentella;s__Tomentella_sp|SH1610974.08FU	7e-107	98.64
OU_33	OU989086	ATATCTCAACCACATATTTTGATGTGTGGCTTGGACTTGGAGGAAACGTGCAGGCTCTGACTCTTGTAGTCTGCTCCTCTGAAAAACATAAGCGGTACCTATATTGGGACTTTGGCTAGGTGTGATACACATCTGCATCTAATCGAGGTTAGCCCGTTGGTCATGCTGCTGATCATTACAACTTGATGAACTTGA	Fungi	Basidiomycota	Agaricomycetes	Agaricales	Inocybaceae	Inocybe	inocybe	MH734508|k__Fungi;p__Basidiomycota;c__Agaricomycetes;o__Agaricales;f__Inocybaceae;g__Inocybe;s__Inocybe_bongardii|SH1554217.08FU	1e-98	100
OU_34	OU989087	ACACCTCAACTCTTCATGGTTTTCCATGATGAGCTTGGACTTTGGGGGACTTGCTGGCCTACAGTCAGCTCCTCTAAAATAAATCAGCTTGCCAGTGTTTGGTGGGTATCGCAGGTGTGATAACTATCTACGCTTGTGGTTTTCCACCAAGTAACCTTCAGCAGTGGAGGTTCACTGGAGCTCACAGACGTCTCTCCTCAGTGAGGGACAGCCCTTTGAAT	Fungi	Basidiomycota	Agaricomycetes	Thelephorales	Thelephoraceae	_	tomentella-thelephora	KX510027|k__Fungi;p__Basidiomycota;c__Agaricomycetes;o__Thelephorales;f__Thelephoraceae;g__unidentified;s__Thelephoraceae_sp|SH1502234.08FU	6e-113	100
OU_35	OU989088	TACTCTCACACTCCAATTTTGGAGAAGTGGACTTGGGTGTTGCTGCTTTGCAGTGGCTCATCTTAAATACGCTAGTGCAACTCATAGTTGGATATAGTACAGCGTGATAAGTATCTTCGCTGGCGCCTCATGAAGAGGGTATCCGATTGGGAGCTCTGTGCTTCTAACAGTCCTGTCTGGGACAATCTCTGACA	Fungi	Basidiomycota	Agaricomycetes	Sebacinales	Sebacinaceae	Sebacina	sebacina	HG796954|k__Fungi;p__Basidiomycota;c__Agaricomycetes;o__Sebacinales;f__Sebacinaceae;g__Sebacina;s__Sebacina_sp|SH1190553.08FU	1e-94	98.97
OU_36	OU989089	TACTCTCACACTCTCTGATCCTTTGGATTCAGGGAGCGGTGGACTTGGGTGTTTGCCGCTTTCCTTGTGGCTCACCTCAAATGTGTTAGTGCACCTCTTGGTTGGACATAGAACGGCGTGATAAGTGTCTTCGCCGGCACCTCGCAAGAGGGTGGCCAATTGGGAGCTCTGTGCTTTCAAACCGTCTTCGGACAATCTCTGACA	Fungi	Basidiomycota	Agaricomycetes	Sebacinales	Sebacinaceae	Sebacina	sebacina	HQ446065|k__Fungi;p__Basidiomycota;c__Agaricomycetes;o__Sebacinales;f__Sebacinaceae;g__Sebacina;s__Sebacina_sp|SH1561865.08FU	1e-103	100
OU_37	OU989090	AAACCTCAACTCTCACGGTTCGCCGTGATGAGCTTGGACTTTGGGGGTCTTGCCGGCCCTGCGGTCGGCTCCTCTCAAACGGATCAGCTTGCCAGTGTTTGGTGGCGTCACGGGTGTGATAACTATCTACGCTTGTGGTTTTTCACCAGGTAACCTTCAGCGATGGGGGTTCGCTGGGGCTCATAAACGTCCCTCGAGGACAGCCTTTGAAC	Fungi	Basidiomycota	Agaricomycetes	Thelephorales	Thelephoraceae	_	tomentella-thelephora	AB605663|k__Fungi;p__Basidiomycota;c__Agaricomycetes;o__Thelephorales;f__Thelephoraceae;g__unidentified;s__Thelephoraceae_sp|SH1141075.08FU	7e-82	95.34
OU_38	OU989091	TACTCTCACACTCTCTAATGCCTTGCATTAGGAGCGGTGGACTTGGGTGTTGCTGCTTCACGGTGGCTCACCTGAAATGCAGTAGTGCACCTCCTGGTTGGACATAGTACGGCGTGATAAGTGTCTTCGCCGGCGCCTCGAAAGAGGGTGGCCGATTGGGAGCTCTGGGCTTCTAACTGTCTTAGGACACTCTCTGACA	Fungi	Basidiomycota	Agaricomycetes	Sebacinales	Sebacinaceae	Sebacina	sebacina	KC965965|k__Fungi;p__Basidiomycota;c__Agaricomycetes;o__Sebacinales;f__Sebacinaceae;g__Sebacina;s__Sebacina_sp|SH1561852.08FU	4e-99	99.5
OU_39	OU989092	CAACTTCTCAACCACATTGATTGATTGATGTGGCTTGGACATGGGGGGTGTTTATCTTTTTGCTGGCTTCCTTTCTGAAGTCGGCTCCCCTGAAATGCATTAGTGGTGTCTGAGCGGAACTGCTAGGTGTGATAAATTATCTATGCCTTTTGGTATTCTGCATGAAACAGATCGTGCTGCTTCTAACACAGAACATATTTGATGA	Fungi	Basidiomycota	Agaricomycetes	Agaricales	Inocybaceae	Inocybe	inocybe	KY402220|k__Fungi;p__Basidiomycota;c__Agaricomycetes;o__Agaricales;f__Inocybaceae;g__Inocybe;s__Inocybe_sp|SH2591053.08FU	4e-104	100
OU_40	OU989093	AATTCTCAACCCCACCGATTTGTTTTGGGGGGATTGGACTTGGAGTGTGCTGGCGAAGGTCGGCTCCTCTTTAAATGCATCAGTGGAGAGAAACTTGCCCCAGTGTGATAATCCTGTTGTGCTGTGGTGGGTGAAAGTCTGCTTCCAACTGTCCTCCGGGACGATACACCATCTTA	Fungi	Basidiomycota	Agaricomycetes	Atheliales	Atheliaceae	Amphinema	amphinema-tylospora	UDB026415|k__Fungi;p__Basidiomycota;c__Agaricomycetes;o__Atheliales;f__Atheliaceae;g__Amphinema;s__Amphinema_sp|SH1648320.08FU	2e-86	99.43
OU_41	OU989094	AAAATTCTCAAACCACTTGACGTGGCTTTGGATGTGGGGGCTTTTGTTTGCAGGCTTTTCTTCTCAAGTCTGCTCCCCTGAAATGCATTAGTGGTGTCTGGAGTGGAAACCGCTAGGTGTGATAATTATCGTCTACGCCTTTGGGTATGCCACATGAAACAGATTGTGCTGCTTCCAACGCAACCTTTAACCTTTATGACAA	Fungi	Basidiomycota	Agaricomycetes	Agaricales	Inocybaceae	Inocybe	inocybe	JX630723|k__Fungi;p__Basidiomycota;c__Agaricomycetes;o__Agaricales;f__Inocybaceae;g__Inocybe;s__Inocybe_sp|SH1547270.08FU	7e-92	98.95
OU_42	OU989095	TACTCTCACTCTCCCGATACTTTTGGATCGGGAGTGGTGGACTTGGGTGCTGCTGCTTAACTGTGGCTCGCCTTAAATGAAGTAGTGCAACTCTCGGTTGGACATAGTACGGCGTGATAAGTGTCTTCGCCGGCGCCTCATTCGAGGGTGGCCGATCGGGAGCTCTGTGCTTCAAACTGTCTTCGGACAACATCTGACA	Fungi	Basidiomycota	Agaricomycetes	Sebacinales	Sebacinaceae	Sebacina	sebacina	JF748100|k__Fungi;p__Basidiomycota;c__Agaricomycetes;o__Sebacinales;f__Sebacinaceae;g__Sebacina;s__Sebacina_sp|SH1521273.08FU	8e-101	100
OU_43	OU989096	AAAATTCTCAAACCCACTTGACGTGGCTTTGGATGTGGGGGCTTTTGTTTGCAGGCTTTTCTTCTCAAGTCTGCTCCCCTGAAATGCATTAGTGGTGTCTGGAGTGGAAACCGCTAGGTGTGATAATTATCGTCTACGCCTTTGGGTATGCCACATGAAACAGATTGTGCTGCTTCCAACACAACCTTTATGACAA	Fungi	Basidiomycota	Agaricomycetes	Agaricales	Inocybaceae	Inocybe	inocybe	JX630723|k__Fungi;p__Basidiomycota;c__Agaricomycetes;o__Agaricales;f__Inocybaceae;g__Inocybe;s__Inocybe_sp|SH1547270.08FU	4e-99	100
OU_44	OU989097	ATATATATCAACCCCTCACTCTTGAGTGGCTTGGATGTGGGGGTTTGCTGGCCTCTTTAAAAAAGGTTCAGCTCTCCTGAAATGCATTAGCAGAACAACCTGTTCATTCATTGGTGTGATAACTATCTACGCTGTTGAGTGTGAGGCAGTTCAGCTTTCTAACGGTCCTCGGACAACTTATCATTTT	Fungi	Basidiomycota	Agaricomycetes	Agaricales	Cortinariaceae	Cortinarius	cortinarius	FJ440878|k__Fungi;p__Basidiomycota;c__Agaricomycetes;o__Agaricales;f__Cortinariaceae;g__Cortinarius;s__Cortinarius_sp|SH1173002.08FU	6e-77	94.68
OU_45	OU989098	ACACCTCAACTCTTCATGGTTTTCCATGATGGGCTTGGACTTTGGGGGTCTTGCTGGCCTGCGGTCAGCTCCTCTCAAATGAATCAGCTTTCCAGTGTTTGGCAGCATCACGGGTGTGATAACTATCTACGCTTGTGGTTTTCTGCCAGGTAATCCTCAGTGATGGGGATTCGCTGGGGCTCATAAACGTCTCTCCTCAGTGAAGACAGCTTTGTGAAC	Fungi	Basidiomycota	Agaricomycetes	Thelephorales	Thelephoraceae	_	tomentella-thelephora	KY684672|k__Fungi;p__Basidiomycota;c__Agaricomycetes;o__Thelephorales;f__Thelephoraceae;g__unidentified;s__Thelephoraceae_sp|SH1503427.08FU	3e-105	99.06
OU_46	OU989099	TAACTTCTCAACCATGTTGATTGTTTTTCAATGTGGCTTGGATGTGGGGGTTTATATTTTGCAGGCTTTGTATTAAGTCGGCTCCCCTGAAACACATTAGTGGTATTCTGAGCGGAACTGCTACTATTAGGTGTGATTAACTATCTATGCCTTTTGGTATTCTGCATGAACAGATTGTGCTGCTTCCAACTTGCACATTTTGTGTGTTTGATAA	Fungi	Basidiomycota	Agaricomycetes	Agaricales	Inocybaceae	Inocybe	inocybe	JQ890269|k__Fungi;p__Basidiomycota;c__Agaricomycetes;o__Agaricales;f__Inocybaceae;g__Inocybe;s__Inocybe_sp|SH1634508.08FU	2e-87	94.01
OU_47	OU989100	ACACCTCAACTCTTCATGGTTTTCCATGATGAGCTTGGACTCTGGGGGTCTTGCTGGCCTGTGGTCGGCTCCTCTCAAATGAATCAGCTTGCCGGTGTTTGGTGGGCATCACAGGTGTGATAACTATCTACGCTTGTGGTTTTCCACCAGGGTAACCTTCAGCAGTGGAGGTTCACTGGAGCTCACAAATGTCTCTCCTCAGTGGGGACAGCCCTTTAAAT	Fungi	Basidiomycota	Agaricomycetes	Thelephorales	Thelephoraceae	_	tomentella-thelephora	JF304372|k__Fungi;p__Basidiomycota;c__Agaricomycetes;o__Thelephorales;f__Thelephoraceae;g__unidentified;s__Thelephoraceae_sp|SH1528451.08FU	6e-113	100
OU_48	OU989101	AACTTCTCAACCACATACATTGTCGGTGATGTGGCTTGGATGGTGGGGGTTCTCTGCAGGCCCTTCTTGTCTGCTCCCCTGAAATGCATTAGTGGTATCTGAGCTGCTGCTGTAGGTGTGATAAATCTATCTATGCCTCTGGTATGCTGCATGAACGGATTGCACCGCTTCAAACGATGTAACAACATGACAA	Fungi	Basidiomycota	Agaricomycetes	Agaricales	Inocybaceae	Inocybe	inocybe	JX630697|k__Fungi;p__Basidiomycota;c__Agaricomycetes;o__Agaricales;f__Inocybaceae;g__Inocybe;s__Inocybe_sp|SH1557937.08FU	2e-92	98.45
OU_49	OU989102	AAAACCGTCTCACAGATAATGTGGTATTGGTAGAAGTGGGTAGTACTTAACAGTGCTTTTTCCTACTCTCCTGAAATGAATAGGCCAGAAAAGTGGACCATGGTAACAGACTTTCAGAGTGTTTTAAAATGCTAAACTAGTCTTGCCCAGGTTGGAATCTGAGCCACTGGACCCCCATTTAGTCCAAAACAGAGA	Fungi	Ascomycota	Pezizomycetes	Pezizales	Tuberaceae	Tuber	tuber-helvella	KP276179|k__Fungi;p__Ascomycota;c__Pezizomycetes;o__Pezizales;f__Tuberaceae;g__Tuber;s__Tuber_xuanhuaense|SH1561454.08FU	1e-98	100
OU_50	OU989103	ATATATCAACCTTCTCTTTTTTGAGTTGTTTGGATGTGGGGGTTTGCTGGCCTCTTAAATGATTCAGCTCCCCTGAAATGCATTAGCAGAACAACCTGTTCATTGGCGTGATAATTATCTATGCTATTGAATGTGAGGGCAGTTCAGCTTTCTAACCGTCCTTGGACAATTCATCATTA	Fungi	Basidiomycota	Agaricomycetes	Agaricales	Cortinariaceae	Cortinarius	cortinarius	UDB026934|k__Fungi;p__Basidiomycota;c__Agaricomycetes;o__Agaricales;f__Cortinariaceae;g__Cortinarius;s__Cortinarius_sp|SH1545220.08FU	1e-89	100
OU_51	OU989104	TGAACTCTCAAAGCCCACATCTTGATGTGGCTTTGGACTTGGGGGCTTTTGCAGGCTTTTAATGAAAGGCCTGCTCTCCTGAAATTCATTAGTGGTACCTGGAGTGGAAACCGCTAGGCGTTGATAACATTCATCTATGCCTTTGGTATGCCGCGCAAATGGGCTGCTTCGAAAACGCACATGCTCTTGACAA	Fungi	Basidiomycota	Agaricomycetes	Agaricales	Inocybaceae	Inocybe	inocybe	MK028435|k__Fungi;p__Basidiomycota;c__Agaricomycetes;o__Agaricales;f__Inocybaceae;g__Inocybe;s__Inocybe_sp|SH1562255.08FU	4e-94	98.96
OU_52	OU989105	ACACCTCAACTCACATGGTTTGCCATGATGAGCTTGGACTTTGGGGGGTCTTGCTGGCCTGCGGTCAGCTCCTCTCAAATGGATCAGCTTGCCAGTGTTCGGTGGCATCATGGGTGTGATAACTATCTACGCCTGTGGTTTTCTACTGGATAACCTTCAGTGATGGAGGTTCGCTGGAGCTCATAAATGTCTCTCCTCAGTGAAGACAGCTTTTTGAAC	Fungi	Basidiomycota	Agaricomycetes	Thelephorales	Thelephoraceae	_	tomentella-thelephora	KX510029|k__Fungi;p__Basidiomycota;c__Agaricomycetes;o__Thelephorales;f__Thelephoraceae;g__unidentified;s__Thelephoraceae_sp|SH1502802.08FU	2e-107	99.53
OU_53	OU989106	ACACCTCAACTCTCATGGCTTGCCATGATGAGCTTGGACTTTGGGGGTCTTGCTGGCCTGTGGTCGGCTCCTCTCAAATGAATCAGCTTGCCAGTGTTTGGTGGCATCACAAGTGTGATAACTATCTGCGCTTGTGGTTTCCATCAGATAACCTCCAGTGATGGAGGTTCGCTGGAGCTCATAAATGTCTCTCCTAAGTGAGGACAGCTCTTTTAAT	Fungi	Basidiomycota	Agaricomycetes	Thelephorales	Thelephoraceae	_	tomentella-thelephora	UDB026666|k__Fungi;p__Basidiomycota;c__Agaricomycetes;o__Thelephorales;f__Thelephoraceae;g__unidentified;s__Thelephoraceae_sp|SH1502210.08FU	9e-111	100
OU_54	OU989107	ATATATCAACCTTCTCTTTTTGAGTGGTTTGGATGTGGGGGTTTGCTGGCCTCTTAAAAAGGTCTTGGCTCTCCTGAAATACATTAGCAGAACAACCCTGTTCATTGGTGTGATAACTATCTACGCTATTGAATGTGAAGGGCAGTTTGGCTTTCTAACAGTCCTTGGACAAGCTCATCATTA	Fungi	Basidiomycota	Agaricomycetes	Agaricales	Cortinariaceae	Cortinarius	cortinarius	UDB0746165|k__Fungi;p__Basidiomycota;c__Agaricomycetes;o__Agaricales;f__Cortinariaceae;g__Cortinarius;s__Cortinarius_diasemospermus|SH1545221.08FU	6e-92	100
OU_55	OU989108	ATATATCAACCTCTTCAGCTTATGCTTGTTGAGTGTTGGATGGTGGGGGTTTGCTGGTGTCTTATGAAGTCAGCTCCTCTGAAATGCATTAGCGGAACAATTTGTTGACCGTTCATTGGTGTGATAAAAATATCTACGCTATTGACGTCAGTCAGTTCAGCTTCTAACAGTCCATTGACTTGGACAAATTTTTCATTA	Fungi	Basidiomycota	Agaricomycetes	Agaricales	Cortinariaceae	Cortinarius	cortinarius	UDB013558|k__Fungi;p__Basidiomycota;c__Agaricomycetes;o__Agaricales;f__Cortinariaceae;g__Cortinarius;s__Cortinarius_sp|SH1503744.08FU	3e-100	100
OU_56	OU989109	ATGTCTCAACCACACCATGAGGTGTGGCTTGGATTTGGGGGTTACAGGCCTAGTCTGCTCCCCTGAAATGCATGAGTGGTAACGACCTCTCCATTAAGATGTGATACATATCTGCATCTGGTCGAGGGTTCTGCCGCTATATAAGAGTTGGATTTGATAA	Fungi	Basidiomycota	Agaricomycetes	Agaricales	Inocybaceae	Inocybe	inocybe	KP783442|k__Fungi;p__Basidiomycota;c__Agaricomycetes;o__Agaricales;f__Inocybaceae;g__Inocybe;s__Inocybe_maculata|SH1553917.08FU	1e-77	99.38
OU_57	OU989110	ATACTCTCACACTCTCTAATTAGTTTTAGGGAGCGGTGGACTTGGGTGTTGCCTGGTAGTTTACTGTCAGGCTCATCTCAAATGGATTAGTGCAAAGTCCTAGTTAAACATAACAGCGTGACAAGTAACCCCCTTATGCTGTTTTCTGTGTAATTAGGGTGCTCTGTGCTTTTTATTGTCTTAGGACAATATTTAGGA	Fungi	Basidiomycota	Agaricomycetes	Sebacinales	Sebacinaceae	_	sebacina	FR852352|k__Fungi;p__Basidiomycota;c__Agaricomycetes;o__Sebacinales;f__Sebacinaceae;g__unidentified;s__Sebacinaceae_sp|SH2700064.08FU	7e-67	90.77
OU_58	OU989111	AAACCCCTCAAGCTCAGCTTGGTGTTGGGGCCTGCCGCCTGGCAGCCCTTAAAATCAGTGGCGGTGCCATCTGGCTCTAAGCGTAGTAATTCTTCTCGCTATGGAGTCCCGGTGAATGCTTGCCATCAACCCCCAATTTTCTAT	Fungi	Ascomycota	Leotiomycetes	Helotiales	_	_	helotiales1	GU083117|k__Fungi;p__Ascomycota;c__Leotiomycetes;o__Helotiales;f__unidentified;g__unidentified;s__Helotiales_sp|SH1564475.08FU	5e-67	98.61
OU_59	OU989112	ACACCTCAACTCTCATGGCTTTGCCATGACGAGCTTGGACTTTGGGGGTCTTGCTGGCCTGCGGTCGGCTCCTCTCAAATGAATTAGCTTGCCAGTGTTTGGTGGCATCACGGGTGTGATAACTATCTACGCTTGTGGTTTTCCACCAGGTAACCTTCAGTGATGAAGGTTCGCTGGGGCTCATAAATGTCTCTCCTCAGCGAGGACAGCTCTTTGAAC	Fungi	Basidiomycota	Agaricomycetes	Thelephorales	Thelephoraceae	_	tomentella-thelephora	MK285889|k__Fungi;p__Basidiomycota;c__Agaricomycetes;o__Thelephorales;f__Thelephoraceae;g__unidentified;s__Thelephoraceae_sp|SH1502289.08FU	3e-106	98.62
OU_60	OU989113	ACACCTCAACTCTCACGGTTTTCTGTGATGAGCTTGGACTGTGGGGGTTTGTTGGCCTTTGGTCAACTCCTCTCAAATGAATCAGCTTGCCGGAGTTTGGTGGCATCACAGGTGTGATAACTATCTACGCTTGTTGTCGTCGACCAGGTACCCTCCGATTTCGGGGGTCCTCTGCGGCTTACAAATGTCTCTCCTCAGTGAAGACAACCATTTGAA	Fungi	Basidiomycota	Agaricomycetes	Thelephorales	Thelephoraceae	_	tomentella-thelephora	KF296866|k__Fungi;p__Basidiomycota;c__Agaricomycetes;o__Thelephorales;f__Thelephoraceae;g__unidentified;s__Thelephoraceae_sp|SH1642938.08FU	2e-108	99.54
OU_61	OU989114	TACTCTCACACTCTGATCCTTTGGATTGCGAGTGGTGGACTTGGGTGTTGCTGCTGCGTGGTGGCTCACCTCAAATGCGTTAGTGCAACTCCTGATTGGACATAGTACGGCGTGATAAGTGTCTTCGCCGGCGCCTCGTAAGAGGGTGGCTGATTGGGAGCTCTGTGCTTCACAAACCGTCTTCGGACAATTCTGACA	Fungi	Basidiomycota	Agaricomycetes	Sebacinales	Sebacinaceae	Sebacina	sebacina	KX095158|k__Fungi;p__Basidiomycota;c__Agaricomycetes;o__Sebacinales;f__Sebacinaceae;g__Sebacina;s__Sebacina_sp|SH1183779.08FU	1e-98	99.49
OU_62	OU989115	TAACCCCTCAAGCTCAGCTTGGTGTTGGGGCCTGCCATCTGGCAGCCCTTAAAATCAGTGGCGGTGCCATCTGGCTCTAAGCGTAGTAAATTTTCTCGCTACAGAGTTCTGAAGGATGCTTGCCATCAACCCCCAATTTTTTAT	Fungi	Ascomycota	Leotiomycetes	Helotiales	_	_	helotiales1	AB669661|k__Fungi;p__Ascomycota;c__Leotiomycetes;o__Helotiales;f__unidentified;g__unidentified;s__Helotiales_sp|SH1564443.08FU	2e-65	97.93
OU_63	OU989116	TACTCTCACACTCCCAATTTTTTGGATTGGGAGCGGTGGACTTGGGTGTTGCTGCTTTACGGTGGCTCACCTCAAATGGAGTAGTGCAACTCTCGGTTGGACATAGTACGGCGTGATAAGTGTCTTCGCCGGCGCCTCACTTAGAGGGTGGCCGATCGGGAGCTCTGTGCTTCTAACCGTCTTCGGACAATCTCTGACA	Fungi	Basidiomycota	Agaricomycetes	Sebacinales	Sebacinaceae	Sebacina	sebacina	JX630493|k__Fungi;p__Basidiomycota;c__Agaricomycetes;o__Sebacinales;f__Sebacinaceae;g__Sebacina;s__Sebacina_sp|SH1561881.08FU	4e-99	99.5
OU_64	OU989117	AACTTGTCAACCACATCTATTTTGATGTTGGCTTGGATGTGGGGGTTGTTTGCAGGCTTCTGTAAAATGAAGGTCGGCTCCCCTAAAATGTATTAGTGGTATCCGAGGCTATTACTATCAGGTGTGATAAATTATCTATGCCTTTGGTATGCTGCATGCTGCTTCGAACAAAAACAATGTTGATGA	Fungi	Basidiomycota	Agaricomycetes	Agaricales	Inocybaceae	Inocybe	inocybe	KY402221|k__Fungi;p__Basidiomycota;c__Agaricomycetes;o__Agaricales;f__Inocybaceae;g__Inocybe;s__Inocybe_sp|SH1185090.08FU	2e-71	98.69
OU_65	OU989118	TACTCTCACACTCTCTAATTAGTTAGAGAGCGGTGGACTTGGATGTTGCCTGGTACTTACTGTGTCAGGCTCATCTCAAATGTGTTGGTACGAACTCCTAGTTAAACCTAACGGCGTGATAAGTAACCCCACTCGCTGTTTTCTGTTTGATTAAGAGGTCTGTGCTTCAAATCGTCTTAGGACAATGTCTAATA	Fungi	Basidiomycota	Agaricomycetes	Sebacinales	Sebacinaceae	_	sebacina	KY684560|k__Fungi;p__Basidiomycota;c__Agaricomycetes;o__Sebacinales;f__Sebacinaceae;g__unidentified;s__Sebacinaceae_sp|SH1150326.08FU	8e-76	93.75
OU_66	OU989119	AAACTCTCAAACCACATCATTCGTTTGACGTGGCTTTGGACGTGGGGGTTGCTGGCTTTCTTCAGCCTGCTCCTCTGAAAAGCATTAGTGGTATCTGGAGTGGAAAACCGCTAGGTGTGATAATACTGTCTATGCCTTTGGTTTATGCCGCATGTGCTGCTTCCAACCGCACATTTTTGACAA	Fungi	Basidiomycota	Agaricomycetes	Agaricales	Inocybaceae	Inocybe	inocybe	KM588779|k__Fungi;p__Basidiomycota;c__Agaricomycetes;o__Agaricales;f__Inocybaceae;g__Inocybe;s__Inocybe_sp|SH1174114.08FU	6e-92	100
OU_67	OU989120	AATCCTCAACCCCACCGATTTGTTTCGGGGGGATTGGACTTGGAGTGTGCTGGCGAAGGTCGGCTCCTCTTTAAATGCATCAGTGGAGAAGAAACTCGCCCCAGTGTGATAATCCTGTTGCGCTGTGGTGGGGTGAAAGTCTGCTTCCAACCGTCCTCCGGGACAAGACATCATCTCA	Fungi	Basidiomycota	Agaricomycetes	Atheliales	Atheliaceae	Amphinema	amphinema-tylospora	UDB020319|k__Fungi;p__Basidiomycota;c__Agaricomycetes;o__Atheliales;f__Atheliaceae;g__Amphinema;s__Amphinema_sp|SH1648320.08FU	2e-87	99.44
OU_68	OU989121	AATTCTCAACCCCACCGATTTGCTTCGGGGGGATTGGACTTGGAGCGTGCTGGCGAAGGTCGGCTCCTCTTTAAATGCATCAGTGGAGAGAAACTCGCCCCAGTGTGATAATCCTGTTGCGCTGTGGTGGGTGAAAGTCTGCTTCCAACCGTCCTCCGGGACATACACCATCTCA	Fungi	Basidiomycota	Agaricomycetes	Atheliales	Atheliaceae	Amphinema	amphinema-tylospora	UDB026405|k__Fungi;p__Basidiomycota;c__Agaricomycetes;o__Atheliales;f__Atheliaceae;g__Amphinema;s__Amphinema_sp|SH1648320.08FU	7e-86	99.43
OU_69	OU989122	CACCACTCAAGCCTGGCTTGGTGTTGGGCGACGTCCCCTTTGGGGACGCGCCTCGAAACGCTCGGCGGCGTGGCACCGGCTTTAAGCGTAGCAGAATCTTTCGCTTTGGAAGTCGGGGCCCCGTCTGCCGGAAGACCTATTCGCAA	Fungi	Ascomycota	Dothideomycetes	Mytilinidales	Gloniaceae	Cenococcum	cenococcum	KU861492|k__Fungi;p__Ascomycota;c__Dothideomycetes;o__Mytilinidales;f__Gloniaceae;g__Cenococcum;s__Cenococcum_geophilum|SH1639590.08FU	2e-71	100
OU_70	OU989123	ACACCTCAACTCTCATGGCTTGCCATGATGGGCTTGGATTATGGGGGTCTTGCTGGCCTATGGTCAGCTCCTCTCAAATGGATCAGCTTTCCAGTTTTTGGTGGCATCACGAGTGTGATAACTATCTACGCTTGTGGTTTTCTGCCAGGTAACCTTCAGTGATGGGGGTTTGCTGGGGCTCATAAATGTCTCTCCTCAGTGAAGACAGGTTTTTGAAT	Fungi	Basidiomycota	Agaricomycetes	Thelephorales	Thelephoraceae	Tomentella	tomentella-thelephora	UDB018453|k__Fungi;p__Basidiomycota;c__Agaricomycetes;o__Thelephorales;f__Thelephoraceae;g__Tomentella;s__Tomentella_sp|SH1502203.08FU	3e-111	100
OU_71	OU989124	CACACCTTATCACACTATTTGTGGTGTTGGCAGGAGTGAATTGTTAGCCTATGAATATGAAAATATTGTAGCCGTTCACTATGCTAAAAGCTACGGGAAGGTTACCAGGCATGAACGACGGACTTTGTAAATGGTTGTAAGACCTGTATCAGTCACAAGTCATGTCTGGTCCTCGGACCTTAAGGACCCCCATCCTAGATGAACCATG	Fungi	Ascomycota	Pezizomycetes	Pezizales	Tuberaceae	Tuber	tuber-helvella	LC415747|k__Fungi;p__Ascomycota;c__Pezizomycetes;o__Pezizales;f__Tuberaceae;g__Tuber;s__Tuber_indicum|SH1563426.08FU	3e-55	86.06
OU_72	OU989125	ATAATATCAACCTTTTTGGTTGGATGTGGGTTTGCTGGCCTTTTTGAGGTCAGCTCCCCTTAAATGCATTAGCGGACAACATTTTGCCAACAGTTCATTGGTGTGATAATTATCTACGCTATTGACGTGAAGCAAAGGTTCAGCTTCTAACAGTCCATTGACTTGGACAAGCCTATTTTTATTA	Fungi	Basidiomycota	Agaricomycetes	Agaricales	Cortinariaceae	Cortinarius	cortinarius	FJ157118|k__Fungi;p__Basidiomycota;c__Agaricomycetes;o__Agaricales;f__Cortinariaceae;g__Cortinarius;s__Cortinarius_sp|SH1571819.08FU	1e-83	97.28
OU_73	OU989126	AATTCTCAACTCCGATCGATTTGTTTCGACCTCGGAGCTTGGACTTTGGAGCGTGCTGGCGTCTGTCGGCTCCTCTTAAACGCATCAGCGGAACGTAACCCCGGACATCAGTGTGATAATGGCGTTGCGCTGTCGTCCGAGGTATTGAAAGTCCCGCTCATAATGGTCTTCGGACAAACTTTACAATCAA	Fungi	Basidiomycota	Agaricomycetes	Atheliales	Atheliaceae	Piloderma	piloderma	UDB004947|k__Fungi;p__Basidiomycota;c__Agaricomycetes;o__Atheliales;f__Atheliaceae;g__Piloderma;s__Piloderma_sp|SH1172617.08FU	2e-87	97.38
OU_74	OU989127	ACACCTCAACTCTCGTGGCTTGCCATGATGAGCTTGGACTTTGGGGGTCTTGTTGGCCTGTGTGCCAGCTCCTCTTAAATGAATTAGCTTGCCGGTGTTTGGTGGCGCCATGGGTGTGATAAATATCTACGCTTGTGGTTTCCCACCAGCTAACCTTCAGTGATGGAGGTTCACTGGAGCTTATAAACGTCTCTCCTTGGAGAGGACGCATTTTGACC	Fungi	Basidiomycota	Agaricomycetes	Thelephorales	Thelephoraceae	_	tomentella-thelephora	LC364196|k__Fungi;p__Basidiomycota;c__Agaricomycetes;o__Thelephorales;f__Thelephoraceae;g__unidentified;s__Fungi_sp|SH1610975.08FU	3e-111	100
OU_75	OU989128	AAAACTCTCATACCACATCTTTTGATGTGGCCTTTGGACGTGGGGGCTTTTGCAGGCTTTTTTCTTGAGAGTCTGCTCCCCTGAAATGCATCAGTGGTATCTGGAGCGGAAACCGCTAGGTGTGATAACATCATCTATGCCTTTGGTATGCCGCGCATGTGCTGCTTCCAACGCACAATTTATTGACAA	Fungi	Basidiomycota	Agaricomycetes	Agaricales	Inocybaceae	Inocybe	inocybe	KY322599|k__Fungi;p__Basidiomycota;c__Agaricomycetes;o__Agaricales;f__Inocybaceae;g__Inocybe;s__Fungi_sp|SH1562290.08FU	1e-63	98.55
OU_76	OU989129	AAAACCGACTCACATATCATGTGGTATTGGTAGAAGTGGATAGTACTAACACTACTTTGTCTTACTCTGCTGAAATGAATAGGCCAGAAAAGTGGACCATGGTAATAGATTCCAGGAGTGTTTTAAAATGCTATACTAGTCTTATCCAAGTCATATTCTGAGCCACTGGACCCCCCATTTAGTCCAAACAACAGT	Fungi	Ascomycota	Pezizomycetes	Pezizales	Tuberaceae	Tuber	tuber-helvella	KT182910|k__Fungi;p__Ascomycota;c__Pezizomycetes;o__Pezizales;f__Tuberaceae;g__Tuber;s__Tuber_sp|SH1561429.08FU	1e-98	100
OU_77	OU989130	ATATTCTCAAACCACATTGATTCTTTCGGTGTGGCTTGGAAGTGGGGGTTGTGCAGGCTTTAGAAATGAAGTCTGCTCCCCTGAAATGCATTAGTGGTATCTGAGCAGAAGAACTACTACAGGTGTGATAATTTATCTACGCCTTGGTATACTGCAGAAACAGATTGCGCTGCTTATAACAACATTTTTGTTTTATTT	Fungi	Basidiomycota	Agaricomycetes	Agaricales	Inocybaceae	Inocybe	inocybe	AY702780|k__Fungi;p__Basidiomycota;c__Agaricomycetes;o__Agaricales;f__Inocybaceae;g__Inocybe;s__Inocybe_sp|SH1527519.08FU	6e-97	98.99
OU_78	OU989131	ATATATATCAACCCTCATCTTGAGTGGTTTGGATGTGGGGGGTTTGCTGGCCTCTTAAAAGGTTCAGCTCTCCTGAAATGCATTAGCGGAACAAACCTTGTTCATTCATTGGTGTGATAACTATCTACGCTATTGAGTGTGAGGCAGTTCAGCTTCTTAACAGTCCTTGGACAACTTATCATTTT	Fungi	Basidiomycota	Agaricomycetes	Agaricales	Cortinariaceae	Cortinarius	cortinarius	FJ803937|k__Fungi;p__Basidiomycota;c__Agaricomycetes;o__Agaricales;f__Cortinariaceae;g__Cortinarius;s__Cortinarius_sp|SH1545596.08FU	5e-93	100
OU_79	OU989132	AATTCTCAACTATTATCAGCTTTTGTTGATAATGGCTTGGATATGGGGGTTTATTTTGCTGGCTTCTTCACAGATTGTCAGCTCCCCTTAAATGCATTAGCCGGTGCCCCGCGTGGACTGTCTATTGGTGTGATAATTATCTACGCCGTGGACATCTACAATCATATGGGTTTGCACTGCTTCCAACCGTCTGTTTATTCAGACAATACATGACA	Fungi	Basidiomycota	Agaricomycetes	Agaricales	Hymenogastraceae	Hebeloma	hebeloma-alnicola	KY081721|k__Fungi;p__Basidiomycota;c__Agaricomycetes;o__Agaricales;f__Hymenogastraceae;g__Hebeloma;s__Hebeloma_dunense|SH1563787.08FU	1e-109	100
OU_80	OU989133	CATACCACTCAAGCTCTTCTGCTTGGTCATGGAAGAAGAGTATGCTTGCATCCTCTCTTCTGAAATCGAATGGCGGACCGCCTCATGTGCCTCGCGTAGTAAGTTCATCTTTTCGCTGGGAGCATGAGACAGTCTCGCCATCAACCCCCATACTTCTAA	Fungi	Ascomycota	Pezizomycetes	Pezizales	Pyronemataceae	Wilcoxina	wilcoxina	KC965885|k__Fungi;p__Ascomycota;c__Pezizomycetes;o__Pezizales;f__Pyronemataceae;g__Wilcoxina;s__Wilcoxina_rehmii|SH1557656.08FU	9e-75	98.73
OU_81	OU989134	AATACCTCTCAAGCACCATTGCTTGGTCATGGAAGATGAGTATGCTTGCATTCTCCCTTCTGAAATTCAAAGGCGGATCATCTCATATTCCCTGGCGTAGTAAGTGTTTATCTTTCGCTTGGAGTGTGTGACAGTCTTGCCATCGACCCCCATTATTTCAA	Fungi	Ascomycota	Pezizomycetes	Pezizales	Pyronemataceae	Wilcoxina	wilcoxina	KU245940|k__Fungi;p__Ascomycota;c__Pezizomycetes;o__Pezizales;f__Pyronemataceae;g__Wilcoxina;s__Wilcoxina_mikolae|SH1557657.08FU	9e-80	100
OU_82	OU989135	AAAACCTTCAAGCATGGATTCCTTTCATGACTTGGTTTTGGAGTTGGAGTGGACATGTGTCATTCCTATCCGAAAATCAATGGCAATGTCGTCTGTACCAATAAGCGTAGTAATCAACATTATGTTTCGCTTTTTGTACAGCTATTCATTTGCCGTTAACCCCCCTCACTATTTTCAAGT	Fungi	Ascomycota	Pezizomycetes	Pezizales	Pyronemataceae	Pulvinula	pulvinula	EU668294|k__Fungi;p__Ascomycota;c__Pezizomycetes;o__Pezizales;f__Pyronemataceae;g__Pulvinula;s__Pulvinula_sp|SH1621910.08FU	3e-85	98.33
OU_83	OU989136	GAATCAACTCACGCACTTTTGCGTGGTCGTGGAGGAAGAGTCCGTCTTGCTGCGGTCTCCCCCCGAAAATCAACGGCGGAAAGTCACTGGCGCCTGGCGTAGTAGTATTGTTCGCCGTTCAACCAGTGTCGTTCCTGCCGGCAAACCCCCCACAGTTCTCTT	Fungi	Ascomycota	Pezizomycetes	Pezizales	Pyronemataceae	Geopora	geopora	JX630440|k__Fungi;p__Ascomycota;c__Pezizomycetes;o__Pezizales;f__Pyronemataceae;g__Geopora;s__Geopora_sp|SH1637499.08FU	1e-77	98.78
OU_84	OU989137	ACACCTCAACTCTCATGGTCCGCCATGATGAGCTTGGACTTTGGGGGCCTTGCCGGCCTACTGTCGGCTCCCCTCAAATGAATCAGCTTGCCAGTGTTTGGTGGCATCACAGGTGTGATAACTATCTACGCCTGTGGTCTACTGCCAGGTAACCTCCAGCAATGGAGGTTCGCTGGAGCTCACAAATGTCTCTCCTCAGTGAGGACAGCTTCTTGAAC	Fungi	Basidiomycota	Agaricomycetes	Thelephorales	Thelephoraceae	Tomentella	tomentella-thelephora	KC966038|k__Fungi;p__Basidiomycota;c__Agaricomycetes;o__Thelephorales;f__Thelephoraceae;g__Tomentella;s__Tomentella_sp|SH1140668.08FU	6e-98	96.33
OU_85	OU989138	TACTCTCACACTCTAATTTTGGAGAAGTGGACTTGGGTGTTGCTGCTTTGCGGTGGCTCATCTTAAATATGCTAGTGCAACTCATGGTTGGATATAGTACAGCGTGATAAGTATCTTTGCTGGCGCCTCATGAAGAGGGTATCTGATTCGGAGCTCTGTGCTTCTAACAGTCCTGTCTGGGACAATCTCTGACA	Fungi	Basidiomycota	Agaricomycetes	Sebacinales	Sebacinaceae	Sebacina	sebacina	UDB026642|k__Fungi;p__Basidiomycota;c__Agaricomycetes;o__Sebacinales;f__Sebacinaceae;g__Sebacina;s__Sebacina_sp|SH1572359.08FU	5e-88	96.91
OU_86	OU989139	AAATCAAATCAAGCAATTTTGCATGGTCATGGAGGAAGAGTCCACCCGGTGTGGTCTCCCCGCCGAAATGCAATGGCGGAAAGTCTCCGATACTTGGCGTAGTAGTAACGTTCGCTTTGTATTTGCAGTCATTCCTGCCAGCAAAACCCCCACAATTCTCTT	Fungi	Ascomycota	Pezizomycetes	Pezizales	Pyronemataceae	Geopora	geopora	JN558642|k__Fungi;p__Ascomycota;c__Pezizomycetes;o__Pezizales;f__Pyronemataceae;g__Geopora;s__Geopora_sp|SH1573079.08FU	1e-68	95.68
OU_87	OU989140	AACTTCTCAACCACGTTGGATATTAATCTTTTCAATGTTGGCTTGGATGTGGGGGTTGTTTGCAGGCTTTTTGTAACAAAAAGGTCGGCTCCCCTGAAATATATTAGTGGTATCTGAGGCTATTGCTATTAGGTGTGATAATTATCTATGCCTTTTGGGTATGCCGCATGAACAGATTACACTGCTTCTAACGAAAACTATTTTGATGA	Fungi	Basidiomycota	Agaricomycetes	Agaricales	Inocybaceae	Inocybe	inocybe	HQ604476|k__Fungi;p__Basidiomycota;c__Agaricomycetes;o__Agaricales;f__Inocybaceae;g__Inocybe;s__Inocybe_fuscidula|SH1564035.08FU	2e-106	100
OU_88	OU989141	ATATTATCAACCTTTTTGGTTGGATGTGGGTTTGCTGGCCTCTTGAGGTCAGCTCTCCTTAAATGCATTAGCGGACAACATTTTTGCCAACCGTTTATTGGTGTGATAATTATCTACGCTATTGACGTGAAGCAAGGTTCTGCTTCTAACAGTCCATTGACTTGGACAAGCCATCTTTTATTA	Fungi	Basidiomycota	Agaricomycetes	Agaricales	Cortinariaceae	Cortinarius	cortinarius	UDB036986|k__Fungi;p__Basidiomycota;c__Agaricomycetes;o__Agaricales;f__Cortinariaceae;g__Cortinarius;s__Cortinarius_caesiocinctus|SH1503892.08FU	6e-92	100
OU_89	OU989142	ACACCTCAACTCTCATGGTTCGCTATGATGAGCTTGGACTTTGGAGGTCTTGCTGGCCTGTGGTCAGCTCCTCTCAAATGAATCAGCTTGCCAGTGTTTGGTGGCATCGCAGGTGTGATAAATATCTACGCTTGTGGTTTTCTGCCAGATAACCTTCAGCAATGGGGGTTCATTGGAGCTCATAAATATCTATCCTCAGTGAGGATAGCTCTTTGAAT	Fungi	Basidiomycota	Agaricomycetes	Thelephorales	Thelephoraceae	_	tomentella-thelephora	KY346539|k__Fungi;p__Basidiomycota;c__Agaricomycetes;o__Thelephorales;f__Thelephoraceae;g__unidentified;s__Thelephoraceae_sp|SH1243572.08FU	2e-108	99.09
OU_90	OU989143	AATTCTCAACTGCCCCCAGGCTTTGTGGCCTGCGGGTGAAGTTGGACTTGGAGGCATGCTGGCGCGCATGAATGGGCTTTGTGCCCTGCTGTGCTTGTCGGCTCCTCTTGAATGCATGAGCTTTCCAATCCTTGGCAAAGTATCGTCGATGTGATAATTATCTGCGTCGCCCGAGAAAGCCTAAAAGGGGAAATCTTTGATCACGTTGGGTTGACCCACGTTTGACAA	Fungi	Basidiomycota	Agaricomycetes	Thelephorales	Thelephoraceae	Tomentellopsis	tomentellopsis	JQ711898|k__Fungi;p__Basidiomycota;c__Agaricomycetes;o__Thelephorales;f__Thelephoraceae;g__Tomentellopsis;s__Tomentellopsis_submollis|SH1518340.08FU	2e-113	99.12
OU_91	OU989144	ATATATATATCAACCCTCTCTTTGTTGAGTGGTTTGGATGTGGGGGTTTGCTGGCCTCTTAAATGGTTCAGCTCCCCTGAAATGCATTAGCAGAACAACCCTGTTCATTGGTGTGATAACTATCTACGCTATTGAATGTGAAGGGAAGTTCAGCTTTCTAACTGTCTTTGGACAATTCATCATTA	Fungi	Basidiomycota	Agaricomycetes	Agaricales	Cortinariaceae	_	cortinarius	MK285750|k__Fungi;p__Basidiomycota;c__Agaricomycetes;o__Agaricales;f__Cortinariaceae;g__unidentified;s__Cortinariaceae_sp|SH1545228.08FU	5e-93	100
OU_92	OU989145	AGTTCTCAGCCTGCATCCTTTTTGAAGGGGATGTGGATTTGGATTATGGAGTTTGCAGGCTTGATTGAAAGGTCTGCTCCTCTGAAATGTATTAGTGGCAATGTGGAAAAGCTACTGTGGGTGTGATAACTATCTATGCCTATGCAGTGCTCTGCTGTGTGCCGCTTTGGAGGGAGAAATTTATTTCTGACAA	Fungi	Basidiomycota	Agaricomycetes	Agaricales	Inocybaceae	Inocybe	inocybe	MH310758|k__Fungi;p__Basidiomycota;c__Agaricomycetes;o__Agaricales;f__Inocybaceae;g__Inocybe;s__Inocybe_sp|SH1623066.08FU	6e-92	98.45
OU_93	OU989146	AAACTCTCAAACCACATCATTCGTTTGACGTGGCTTTGGACGTGGGGGTTGCCGGCTTTCTCCTCAGAGAGCCCTGCTCCCCTGAAATGCATTAGTGGTATCTGGAGTGGAAAACCGCTAGGTGTGATAATACTGTCTATGCCTTTGGTTATGCCACAATGTGCTGCTTCCAACCACATTTTATTTTGACAA	Fungi	Basidiomycota	Agaricomycetes	Agaricales	Inocybaceae	Inocybe	inocybe	KX510016|k__Fungi;p__Basidiomycota;c__Agaricomycetes;o__Agaricales;f__Inocybaceae;g__Inocybe;s__Inocybe_sp|SH1174119.08FU	6e-92	100
OU_94	OU989147	AACTTGTCAACCACATCTATTTTGATGTTGGCTTGGATGTGGGGGTTGTTTGCAGGCTTCTGTAAAAGTCGGCTCCCCTAAAATGTATTAGTGGTATCCGAGGCTATTACTATCAGGTGTGATAAATTATCTATGCCTTTGGTATGCTGCATACTGCTTCGAACAAAAACAATGTTGATGA	Fungi	Basidiomycota	Agaricomycetes	Agaricales	Inocybaceae	Inocybe	inocybe	KY402221|k__Fungi;p__Basidiomycota;c__Agaricomycetes;o__Agaricales;f__Inocybaceae;g__Inocybe;s__Inocybe_sp|SH1185090.08FU	2e-61	95.42
OU_95	OU989148	ACACCTCAACTCTCATGGTTTGCCATGATGAGCTTGGACTTTGGGGGTCTTGCTGGCCTGCGGTCAGCTCCTCTCAAATGAATCAGCTTGCCAGTGTTTGGTGGCATCACAGGTGTGATAACTATCTACGCTTGTGGTTTTCCACCAGGTAACCTTCAGCGATGGAGGTTCACTGGAGCTCATAAATGTCTCTCCCCAGTGAAGACAGCTTTGTGAAT	Fungi	Basidiomycota	Agaricomycetes	Thelephorales	Thelephoraceae	_	tomentella-thelephora	KU176256|k__Fungi;p__Basidiomycota;c__Agaricomycetes;o__Thelephorales;f__Thelephoraceae;g__unidentified;s__Thelephoraceae_sp|SH1502211.08FU	6e-108	99.08
OU_96	OU989149	AATTCTCAACCACACCTGCCTGGTGTGGCTTGGATTTGGGCTGTTGCAGGCTTGTAGTCTGCTCCCCTGAAATTAATTAGCGGTACCTTGGTGGAACTGTCTACAGGTGTGATAATTATCTACATCCTAGACATCTGCTGGAATGCTGCTTTCTAAACGTATTTGACAA	Fungi	Basidiomycota	Agaricomycetes	Agaricales	Inocybaceae	Inocybe	inocybe	KC966275|k__Fungi;p__Basidiomycota;c__Agaricomycetes;o__Agaricales;f__Inocybaceae;g__Inocybe;s__Inocybe_sp|SH1649738.08FU	1e-58	93.08
OU_97	OU989150	ACACCTCAACTCTCATGGTTCGCCGTGATGAGCTTGGACTTTGGGGGTCTTGCTGGCCTGCGGTCGGCTCCTCTCAAATGAATCAGCTTGCCAGTGTTTGGTGGCATCACAGGTGTGATAACTATCTACGCTTGTGGTTTTCTACCAGGTAACCTTCAGCAATGGAGGTTCGCTGGAGCTCATAAATGTCTCTCCCCAGTGAAGACAGCTTCGTGAAC	Fungi	Basidiomycota	Agaricomycetes	Thelephorales	Thelephoraceae	Tomentella	tomentella-thelephora	JX630448|k__Fungi;p__Basidiomycota;c__Agaricomycetes;o__Thelephorales;f__Thelephoraceae;g__Tomentella;s__Tomentella_sp|SH1502211.08FU	4e-104	98.16
OU_98	OU989151	ATATTATCAACCTCTTTGGTTGGATGTGGGTTTGCTGGCCTCTTGAGGTCAGCTCTCCTTAAATGCATTAGCGGACAACATTTTGCCAACTGTTCATTGGTGTGATAATTATCTACGCTATTGACGGTGAAGCAAGGTTCAGCTTCTAACAGTCCATTGACTTGGACAAGCTTATTTTATTA	Fungi	Basidiomycota	Agaricomycetes	Agaricales	Cortinariaceae	Cortinarius	cortinarius	UDB036985|k__Fungi;p__Basidiomycota;c__Agaricomycetes;o__Agaricales;f__Cortinariaceae;g__Cortinarius;s__Cortinarius_metarius|SH1503752.08FU	2e-91	100
OU_99	OU989152	ACTCCTCAACTCCTCATGGTTCGCCGTGATGAGCTTGGACTTTTGGGGGTCTTGCTGGCCCTATGGTTGGCTCCTCTCAAATGGATCAGCTTGCCAGTGTTTGGTGGCATCACAGGTGTGATAAATATCTACGCTTGTGGTTTTCCACCACGTAACCTTCAGCGATGAAGGTTTGCTGGAGCTCACAAATGTCCCTCCTCGGCGAGGACGGCTTTTTGAAC	Fungi	Basidiomycota	Agaricomycetes	Thelephorales	Thelephoraceae	Tomentella	tomentella-thelephora	EU516674|k__Fungi;p__Basidiomycota;c__Agaricomycetes;o__Thelephorales;f__Thelephoraceae;g__Tomentella;s__Tomentella_sp|SH1528434.08FU	1e-90	94.5
OU_100	OU989153	AACTATCAAACAAGATAGATTTATTTCTTATCTCTGTTTGGATTTGGACTCTGCTGTGTCAATACGGCTAGTCCTAAATGTATTAGCTGGTCCAAGTGAAGGTTTGGTTCTACTCAGCATGATAATTATCTGATGTTGAGGACAGTCTCAGGACTGGCCAGACTCTCTCTGGATTGCTTCTAATCGTCTTAGGACAATTGCTCAAT	Fungi	Basidiomycota	Agaricomycetes	Cantharellales	Hydnaceae	_	cantharellus	UDB031649|k__Fungi;p__Basidiomycota;c__Agaricomycetes;o__Cantharellales;f__Hydnaceae;g__unidentified;s__Hydnaceae_sp|SH2596970.08FU	2e-101	99.03
OU_101	OU989154	AAAACCACTCAAGTAGTTTTGCTTGGTTATGAAAGAAGAGTTTGCTTGCAAATTCCCTTTCGAAATTCAATGGCGGAGAGTCTCATGATTCCAGCGTAGTAATAACTTATTCGCTTGGTCATTGTAACAATCCTGCCTTCAACCCCCAATTCTAAT	Fungi	Ascomycota	Pezizomycetes	Pezizales	Pyronemataceae	Pustularia	pustularia	KF061020|k__Fungi;p__Ascomycota;c__Pezizomycetes;o__Pezizales;f__Pyronemataceae;g__Pustularia;s__Pustularia_sp|SH1547531.08FU	5e-77	100
OU_102	OU989155	AATTCTCAACCATTATCAACTTTTGCTGATAATGGCTTGGATGTGGGGGTCTATTTTGCTGGCTTCTCAGATAGTCAGCTCCCCTTAAATGCATTAGCCGGTGCCCCGCGTGGACTGTCTATTGGTGTGATAATTATCTACGCTATAGACATCTGCAATCATATGGGTTTGCGCTGCTTCTAACAGTCTGTTGATTCAGACAATACATGACA	Fungi	Basidiomycota	Agaricomycetes	Agaricales	Hymenogastraceae	Hebeloma	hebeloma-alnicola	MH795032|k__Fungi;p__Basidiomycota;c__Agaricomycetes;o__Agaricales;f__Hymenogastraceae;g__Hebeloma;s__Hebeloma_sp|SH1563966.08FU	5e-108	100
OU_103	OU989156	AATTCTCAACCTTCTCGGTTTTCTTCTGGACACCGAAGGAGGCTTGGACATTGGAGGCCTTTGCTGGCGTCTCTTAGACCCAGCTCCTCTTAAATGAATTAGCGGGGTCCTCTTTGCCGATCCTTGACATGTGATAAGATGTTTCCATGACTTGGTTTCTGGCTCTGTTGCATTTGGGACCCGCTTCTAACCGTCTCGACGAGACAACGTTTGGGCGTGTCTCCCTTCTCGGGAGACTCTCTCAACCCCCACGAAC	Fungi	Basidiomycota	Agaricomycetes	Russulales	Russulaceae	_	russula-lactarius	UDB0748002|k__Fungi;p__Basidiomycota;c__Agaricomycetes;o__Russulales;f__Russulaceae;g__unidentified;s__Fungi_sp|SH1519110.08FU	2e-132	100
OU_104	OU989157	ACACCTCAACTCTCATGGTCTGCCATGATGAGCTTGGACTTTGGGGGTCTTGCTGGCCTATCGTCAGCTCCTCTCAAATGGATCAGCTTCCCAGTGTTTGGTGGCGTCACAGGTGTGATAACTATCTACGCTTGTGGCTTTCTGCCATTAACCTTCAGCAATGGAGGTTCGCTGGAGCTCACAGATGTCTCTCCTTGGCGAGGACAGCTTTTTGAAC	Fungi	Basidiomycota	Agaricomycetes	Thelephorales	Thelephoraceae	_	tomentella-thelephora	HE601896|k__Fungi;p__Basidiomycota;c__Agaricomycetes;o__Thelephorales;f__Thelephoraceae;g__unidentified;s__Thelephoraceae_sp|SH1611050.08FU	9e-106	98.62
OU_105	OU989158	AATTCTCAACCACACTGACTTTGATAAGTGTGGCTTGGATTTGGGGGGAGAAATTGTTGTGGGCTTTTTTGTAGTCTGCTCCCCTGAAATTAATTAGCGGTACCTTGGTGGAACTGTCTACAGGTGTGATAATTATCTACATCCTAGACATCTGCTGGAATGCTGCTTTCTAAAACCTTACTTGTATTTGACAA	Fungi	Basidiomycota	Agaricomycetes	Agaricales	Inocybaceae	Inocybe	inocybe	FJ378768|k__Fungi;p__Basidiomycota;c__Agaricomycetes;o__Agaricales;f__Inocybaceae;g__Inocybe;s__Inocybe_sp|SH1649743.08FU	1e-79	94.39
OU_106	OU989159	ACACCTCAACTCTCATGGTCCGCCATGATGAGCTTGGACTTTGGGGGTCTTGCCGGCCTAGTGTCGGCTCCTCTCAAATGGATCAGCTTGCCAGTGTTTGGTGGCATCACAGGTGTGATAACTATCTACGCTTGTGGTTTTCTGCCATGTAACCTTCAGTGATGGAGGTTCGCTGGAGCTCACAGATGTCTCTCCTTGGGGAGGACAGCTTTTGAAC	Fungi	Basidiomycota	Agaricomycetes	Thelephorales	Thelephoraceae	_	tomentella-thelephora	JX630472|k__Fungi;p__Basidiomycota;c__Agaricomycetes;o__Thelephorales;f__Thelephoraceae;g__unidentified;s__Thelephoraceae_sp|SH1503207.08FU	2e-107	99.08
OU_107	OU989160	ATATATATCAACCTCTCTCTCTCTTGTTTGAGCGGTTTGGATGTGGGGGGTTTGCTGGACTCTTAAAGGGTTCAGCTCCTCTGAAATGCATTAGCAGAACAACCTGTTCATTGGTGTGATAAACTATCTACGCTATTGAATGTGAGGGGCAGTTCAGCTTTCCAACGGTCCTTGGACAATTTATCATTT	Fungi	Basidiomycota	Agaricomycetes	Agaricales	Cortinariaceae	Cortinarius	cortinarius	UDB037428|k__Fungi;p__Basidiomycota;c__Agaricomycetes;o__Agaricales;f__Cortinariaceae;g__Cortinarius;s__Cortinarius_fuscoperonatus|SH1545310.08FU	1e-78	95.24
OU_108	OU989161	ACACCCTCAACCTTCTTGGTTTATCGACCGGGAAGGATTGGACTTTGGAGGTTTTTGTTGCTGGCCTCGTTTGAAGCCAGCTCCTCCTAAATGAATTAGTGGGGTCCGCCGTGCCGATCCTCGACGTGATAAGTACGCTTCTACGTCTTGGGGTTTCGCACCGTTCTCGCTTCCAACTTCGAGTTGTGACTCGACCTTATAAA	Fungi	Basidiomycota	Agaricomycetes	Russulales	Russulaceae	Russula	russula-lactarius	MN177630|k__Fungi;p__Basidiomycota;c__Agaricomycetes;o__Russulales;f__Russulaceae;g__Russula;s__Russula_sp|SH1567119.08FU	5e-103	100
OU_109	OU989162	ACACCTCAACTCTCATGGTTTGCCGTGATGAGCTTGGACTTTGGGGGTCTTGCTGGCCTATGGGTCGGCTCCTCTCAAATGAATCAGCTTGCCAGTGTTTGGTGGCATCACAGGTGTGATAACTATCTACGCTTGTGGTTTTCCATCAGGTAACCTTCAGTGATGGAGGTTCGCTGGGGCTCATAAATGTCTCTCCTCAGTGAGGACAGCTTTTTGAAC	Fungi	Basidiomycota	Agaricomycetes	Thelephorales	Thelephoraceae	_	tomentella-thelephora	MG274170|k__Fungi;p__Basidiomycota;c__Agaricomycetes;o__Thelephorales;f__Thelephoraceae;g__unidentified;s__Fungi_sp|SH1502201.08FU	3e-110	99.54
OU_110	OU989163	AAGTTCTCAACCACATCGGATTTGTTTTCGGTGTGGCTTGGATATGGGGGTATTTGTTGCAGGCTTTTGAAAAATGAAGTCAGCTCCCCTGAAATGCATTAGTAGTATCTGAGCAGAAAAAACTACTATGGGTGTGATAATTTATCTATGCCCTTGGTATGGCTGCATGAACAGATTGCGCTGCTTCTAACGAGTGTGTATAATAACCACATTTGACAA	Fungi	Basidiomycota	Agaricomycetes	Agaricales	Inocybaceae	Inocybe	inocybe	KM588785|k__Fungi;p__Basidiomycota;c__Agaricomycetes;o__Agaricales;f__Inocybaceae;g__Inocybe;s__Inocybe_sp|SH1190795.08FU	2e-98	96.36
OU_111	OU989164	AAATCTCAACCTTCTCGGTTTTCTTCTGGACACCGAAGGAGGCTTGGACTTTGGAGGCCTTTGCTGGCATCTCTCTCTTCTTGAGAGCCAGCTCCTCTTAAATGAATTAGCGGGGTCCTCTTTGCCGATCCTCGACATGTGATAAGATGTTTCCATGACTTGGTTTCTGGCTCTGTTGCCTTTGGGACCCGCTTCTAACCGTCTCGACGAGACGACGTTTGGGCGCGTCTCCCTTCTCGGGAGACACTCTCAACCCCACGAAC	Fungi	Basidiomycota	Agaricomycetes	Russulales	Russulaceae	Lactarius	russula-lactarius	MN235874|k__Fungi;p__Basidiomycota;c__Agaricomycetes;o__Russulales;f__Russulaceae;g__Lactarius;s__Lactarius_fennoscandicus|SH1558181.08FU	3e-136	100
OU_112	OU989165	ACATCTCAACTCCTCACGGTTCGCCCGTGATGAGCTTGGACTTTGGGGGTCTTGCCGGCCTGCAGGTCGGCTCCTCTCAAATGAATCAGCTTGCCAGTGTTTGGTGGCGTCACAGGTGTGATAAATATCTACGCTTGTGGTTTTCCGCCAGGCAACCTCCAGCGATGGGGGCTCACTGGAGCTCACAAATGTCTCTCCTCGGTGAGGACAGCTCTTTGAAC	Fungi	Basidiomycota	Agaricomycetes	Thelephorales	Thelephoraceae	Tomentella	tomentella-thelephora	UDB025970|k__Fungi;p__Basidiomycota;c__Agaricomycetes;o__Thelephorales;f__Thelephoraceae;g__Tomentella;s__Tomentella_sp|SH1528406.08FU	6e-113	100
OU_113	OU989166	ACACCCTCAACTCTCATGGTCTTCCATGATGAGCTTGGACTTTGGGGGTTTTGCTGGCATAACCGTCGGCTCCTCTCAAATTAATCAGCTTTCCAGTGTTTGGTGTGGCGTCACAGGTGTGATAACTATCTACGCTTGTGGTCTCCCGCCAGTTACCTTCAGTGATGGAGGTTCGCTGGAGCTCACAGACGTCCTCTCCTCAGGGAGGACAGCTTTTGAAC	Fungi	Basidiomycota	Agaricomycetes	Thelephorales	Thelephoraceae	_	tomentella-thelephora	KR149765|k__Fungi;p__Basidiomycota;c__Agaricomycetes;o__Thelephorales;f__Thelephoraceae;g__unidentified;s__Thelephoraceae_sp|SH1159684.08FU	1e-104	97.74
OU_114	OU989167	ACATCTCAACTCCTCACGGTTCGCCCGTGACGAGCTTGGACTTTGGGGGTCTTGCCGGCCTGCAGGTCGGCTCCTCTCAAACGAATCAGCTTGCCGGTGTTTGGTGGCGTCACGGGTGTGATAACTATCTACGCTTGTGGCTTTCCGCCAGGTAACCTCCAGCGATGGGGGTTCACTGGAGCTCACAAACGTCTCTCCTCGGTGAGGACAGCTCTTTGAAC	Fungi	Basidiomycota	Agaricomycetes	Thelephorales	Thelephoraceae	Tomentella	tomentella-thelephora	UDB000250|k__Fungi;p__Basidiomycota;c__Agaricomycetes;o__Thelephorales;f__Thelephoraceae;g__Tomentella;s__Tomentella_lapida|SH1528406.08FU	3e-106	98.19
OU_115	OU989168	ACAACCCCATCACAAAGAGTGTGGTATTGGCAGAAGTGGGTAGGGCCAGCAATGCTGGCCCCACTCTGCTGGAATGAATAGGCCGGAAATGTAGACCATGGTAATAGACTTTCAGAGTATTTTAAGATGCTAAATTAGTTTGTAGACTGGTCAGAATCCAGGCCATTGGACCCCCATTCTGTGTAAAGCAGTAA	Fungi	Ascomycota	Pezizomycetes	Pezizales	Tuberaceae	Tuber	tuber-helvella	KC517480|k__Fungi;p__Ascomycota;c__Pezizomycetes;o__Pezizales;f__Tuberaceae;g__Tuber;s__Tuber_bomiense|SH1648391.08FU	5e-88	96.91
OU_116	OU989169	ACACCTCAACTCTCATGGTTTGCCATGATGAGCTTGGACTTCTGGGGGTTTTGCTGGCTTGCCGTCGGCTCCTCTCAAATGAATCAGCTTGCCAGTGTTTGGTGGCATCACGGGTGTGATAACTATCTACGCTTGTGGTTTTCTGCCAGGTAGCCTTCAGTGATGGAGGTTCGCTGGAGCTCATAAACGTCTCTCCTCAGCGAAGACAGCTTTGTGAAC	Fungi	Basidiomycota	Agaricomycetes	Thelephorales	Thelephoraceae	Tomentella	tomentella-thelephora	UDB022972|k__Fungi;p__Basidiomycota;c__Agaricomycetes;o__Thelephorales;f__Thelephoraceae;g__Tomentella;s__Tomentella_sp|SH1502878.08FU	7e-107	98.63
OU_117	OU989170	ATATATATCAACCCTTCTCTTTTTGAATGGTTTGGATGTGGGGGTTTGCTGGTCTCTTATAGGGTTCAGCTCTCCTGAAATGCATTAGCAGAACAACCTGTTCATTGGTGTGATAACTATCTACGCTTTTGAATGTAAAGGGACAGTTCAGCTTTCTAACCGTCTTTGGACAATCTATCATTT	Fungi	Basidiomycota	Agaricomycetes	Agaricales	Cortinariaceae	Cortinarius	cortinarius	GU234037|k__Fungi;p__Basidiomycota;c__Agaricomycetes;o__Agaricales;f__Cortinariaceae;g__Cortinarius;s__Cortinarius_sp|SH1545468.08FU	6e-92	100
OU_118	OU989171	ATAATATCAACCTTTTTGGTTGGATGTGGGTTTGCTGGTCTCTTGAGGTCAGCTCCCCTTAAATGCATTAGCGGACAACATTTTGCCAACCGTTCATTGGTGTGATAATTATCTACGCTATTGACGTGAAGCAAGGTTCAGCTTCTAACAGTCCATTGACTTGGACAAGCCTCTTCTTTTTATTA	Fungi	Basidiomycota	Agaricomycetes	Agaricales	Cortinariaceae	Cortinarius	cortinarius	UDB016158|k__Fungi;p__Basidiomycota;c__Agaricomycetes;o__Agaricales;f__Cortinariaceae;g__Cortinarius;s__Cortinarius_dalecarlicus|SH1571798.08FU	4e-89	98.92
OU_119	OU989172	AATTCTCAACCCCGAATCGATTTGTTTCTATTCGGGGCTTGGACTTGGAGCGTGCTGGCGAAGGTCGGCTCCTCTCAAATGCATCAGCGGAATTCAACCTTTGGCTTCCGGACATCAGTGTGATAATGACGTTGCGCTGTCGTCCGACCCTCAAAGTCCGCTTACAATGGTCTTCGGACAAAACCTTGCATCAT	Fungi	Basidiomycota	Agaricomycetes	Atheliales	Atheliaceae	Piloderma	piloderma	KM374356|k__Fungi;p__Basidiomycota;c__Agaricomycetes;o__Atheliales;f__Atheliaceae;g__Piloderma;s__Piloderma_sp|SH1544843.08FU	5e-98	100
OU_120	OU989173	CAACCCCTCAAGCTCAGCTTGGTGTTGGGGCCTGCCGCGCTGGCAGCCCTTAAAATCAGTGGCGGTGCCACCTGGCTCTAAGCGTAGTAACTTTTCTCGCTACAGTGTCCTGGTGAGCGCTTGCCATAACCTATATTTTCTAT	Fungi	Ascomycota	Leotiomycetes	Helotiales	_	_	helotiales1	AY969797|k__Fungi;p__Ascomycota;c__Leotiomycetes;o__Helotiales;f__unidentified;g__unidentified;s__Helotiales_sp|SH1564497.08FU	1e-58	95.17
OU_121	OU989174	ATATAATCAACCTTCTCTTGTTTTGAGAATGGTTTGGATGTGGGGGGTTTGCTGGCCTCTCTCAAAAGGTTCAGCTCCCCTGAAATGCATTAGCAGAACAACCTTTGCTCATTGGTGTGATAACTATCTACGCTTATGAATATGAGGGGCAGTTCAGCTTTCTAACGGTCTTTGGACAATTCATCATTA	Fungi	Basidiomycota	Agaricomycetes	Agaricales	Cortinariaceae	Cortinarius	cortinarius	UDB025931|k__Fungi;p__Basidiomycota;c__Agaricomycetes;o__Agaricales;f__Cortinariaceae;g__Cortinarius;s__Cortinarius_sp|SH1545231.08FU	3e-95	100
OU_122	OU989175	AAATCATATCACGCAATTTTGCATGGTCATGGAGGAAGAGTCCACTCGGTGTGGTCTCCCCGCCGAAATGCAACGGCGGAAAGTCTCTGATACTCTGCGTAGTAGTAACGTTCGCTTTGTATCTGTAGTCGTTCCTGCCAGCAAAACCCCCACAATTCTCTT	Fungi	Ascomycota	Pezizomycetes	Pezizales	Pyronemataceae	Geopora	geopora	KJ188583|k__Fungi;p__Ascomycota;c__Pezizomycetes;o__Pezizales;f__Pyronemataceae;g__Geopora;s__Geopora_sp|SH1552934.08FU	2e-80	100
OU_123	OU989176	ACACCTCAACTCTCATGGTCTGCCATGATGAGCTTGGACTTTGGGGGCCTTGCCGGCCTACTGCCGGCTCCTCTCAAATGAATCAGCTTGCCAGTGTTTGGTGGCATCACAGGTGTGATAACTATCTACGCTTGTGGTCTGCCGCCAGGTAACCTCCAGTGATGGAGGTTCGCTGGAGCTCACAAATGTCTCTCCTCAGCGAGGACAGCTTCTTGAAC	Fungi	Basidiomycota	Agaricomycetes	Thelephorales	Thelephoraceae	Tomentella	tomentella-thelephora	KC966038|k__Fungi;p__Basidiomycota;c__Agaricomycetes;o__Thelephorales;f__Thelephoraceae;g__Tomentella;s__Tomentella_sp|SH1140668.08FU	3e-106	98.62
OU_124	OU989177	AAACTCTCAAATAGAGGTGGCTTTGCAGCTATCTCTGTTTGGATTTGGGCTTTGCTGCATTAATGTGGCTAGTCTTAAATGTATTAGCTGATCCTCATTGAGGTTTTGGTTCTACTCAGCGTGATAATTATCTAACGTTGAGGACAGTCTCAGAACTGGCCATGGCTCTCTCTGGGATTGCTTCTAGACTGTCTTGAAGACAATTGCTTAAT	Fungi	Basidiomycota	Agaricomycetes	Cantharellales	Hydnaceae	Hydnum	cantharellus	UDB025116|k__Fungi;p__Basidiomycota;c__Agaricomycetes;o__Cantharellales;f__Hydnaceae;g__Hydnum;s__Hydnum_sp|SH1539298.08FU	4e-104	99.06
OU_125	OU989178	TAACCCCTCAAGCTCAGCTTGGTGTTGGGGCCCGCTGTACTGGCGGCCCCTAAAATCAGTGGCGGTGCCATCTGGCTCTAAGCGTAGTAACTCTTCTCGCTACAGGGTCCCGGTGGATGCTTGCCATCAACCCCCAATTTTCTAT	Fungi	Ascomycota	Leotiomycetes	Helotiales	_	_	helotiales1	KC965147|k__Fungi;p__Ascomycota;c__Leotiomycetes;o__Helotiales;f__unidentified;g__unidentified;s__Helotiales_sp|SH1185400.08FU	5e-57	94.48
OU_126	OU989179	AACTTCTCAACCACATCAGAGATGTGGCTTGGACGTGGGGGTTGTTTGCAGGCTTTTTGTTCTACTGAAGGTCGGCTCCCCTGAAATGTATTAGTGGTATCTGGGCTACTGCTATAGGTGTGATAAATTATCTATGCCTTTGGTATGCTGCATGAACAGATTGCGCTGCTTATAACAAAGATTGAATCTGACAA	Fungi	Basidiomycota	Agaricomycetes	Agaricales	Inocybaceae	Inocybe	inocybe	JF908251|k__Fungi;p__Basidiomycota;c__Agaricomycetes;o__Agaricales;f__Inocybaceae;g__Inocybe;s__Inocybe_subpaleacea|SH1529139.08FU	2e-96	99.48
OU_127	OU989180	ACACCTCAACTCTCATGGTTTCCCATGATGAGCTTGGACTTGGGAGCTTTGTTGGCCCGTGGTCAGCTCTCCTCAAATGAATTAGCTTGCCGGTGTTTGGCAGCGCCATGGGTGTGATAACTTATCTACGCTTGTGACCGCCTGCTAGGTTTCCTCTGATCGCAGAGGTTCGCCGGAGCTTATAAACGTCTCTCCTCAGCAGAGACAGCTGTTTGAA	Fungi	Basidiomycota	Agaricomycetes	Thelephorales	Thelephoraceae	_	tomentella-thelephora	JX630620|k__Fungi;p__Basidiomycota;c__Agaricomycetes;o__Thelephorales;f__Thelephoraceae;g__unidentified;s__Thelephoraceae_sp|SH1502794.08FU	9e-111	100
OU_128	OU989181	TACTCTCACACTCTCCAATTCGGATTCGGATTGGGGAGCGGTGGACTTGGGTGTTGCTGCTTTACTGTGGCTCACCTCAAATGCGTTAGTGCAACTCCTGGTTGGACATAGTACGGCGTGATAAGTATCTTCGCCGGCGCCTCAGAAGAGGGTGGCTAATCGGGAGCTCTGTGCTGCAAACCGTCTTTGGACAATCTCTGACA	Fungi	Basidiomycota	Agaricomycetes	Sebacinales	Sebacinaceae	Sebacina	sebacina	JQ347200|k__Fungi;p__Basidiomycota;c__Agaricomycetes;o__Sebacinales;f__Sebacinaceae;g__Sebacina;s__Sebacina_sp|SH1615389.08FU	2e-96	98.03
OU_129	OU989182	AACTTCTCAACCACATCATCGCGATGTGGCTTGGATGGTGGGGGTTTTTGCAGGCCCTTTCTTGTCTGTCTGCTCCCCTGAAATGCATTAGCGGTATCTGAGCTGCTGCTGTAGGCGTGATAAATCTATCTATGCCTTTGGTATGCTGCATGAACAGATTGCGCCGCTTCCAATGATGTAAAATAACCTGACGA	Fungi	Basidiomycota	Agaricomycetes	Agaricales	Inocybaceae	Inocybe	inocybe	KC965964|k__Fungi;p__Basidiomycota;c__Agaricomycetes;o__Agaricales;f__Inocybaceae;g__Inocybe;s__Inocybe_sp|SH1181257.08FU	3e-55	88.95
OU_130	OU989183	AATTCTCAAACCTCTCAAATTTAGAGGAGAGAGGGTTTGGACTTGGAGTGTGCTGGGTCATGTCAGCTCCTCTTAAATGCATTAGCTTGTACTCTTGTGGATGGGCTTTGGTTTGATAATATCTATGCCATTGCTGTGAAACAAATATCAGCTTCTAACACCCCATACTTTATTATAT	Fungi	Basidiomycota	Agaricomycetes	Agaricales	Hygrophoraceae	Hygrophorus	hygrophorus	JF908069|k__Fungi;p__Basidiomycota;c__Agaricomycetes;o__Agaricales;f__Hygrophoraceae;g__Hygrophorus;s__Hygrophorus_queletii|SH1239058.08FU	3e-89	100
OU_131	OU989184	ACACCTCAACTCTCATGGTCTTCCATGATGAGCTTGGACTTTGGGGGTTTGCTGGCCCTGCGGCCGGCTCCTCTCAAATGAATCAGCTTGCCAGTGTTTGGTGGCATCACGGGTGTGATAACTATCTACGCTCGCGGTCGTCTGCCAGGTAACCCTCAGCGATGAGGGTTCATTGGAGCTCATAAACGTCTCTCCTCGGCGAGGACAACTTTTGAAC	Fungi	Basidiomycota	Agaricomycetes	Thelephorales	Thelephoraceae	_	tomentella-thelephora	LC365286|k__Fungi;p__Basidiomycota;c__Agaricomycetes;o__Thelephorales;f__Thelephoraceae;g__unidentified;s__Fungi_sp|SH1502193.08FU	9e-111	100
OU_132	OU989185	ACACCTCAACTCTCGTGGTCCGCCATGATGAGCTTGGACTTTGGGGGTCTTGCCGGCCTAGTGTCGGCTCCTCTCAAACGGATCAGCTTGCCAGTGTTTGGTGGCGTCACAGGTGTGATAACTATCTACGCTTGTGGTCCCCTGCCATGCAACCTTCAGCAATGGAGGTTCGCTGGAGCTCACAGATGTCTCTCCTCGGCGAGGACAGCTTTTTGAAC	Fungi	Basidiomycota	Agaricomycetes	Thelephorales	Thelephoraceae	_	tomentella-thelephora	MK285892|k__Fungi;p__Basidiomycota;c__Agaricomycetes;o__Thelephorales;f__Thelephoraceae;g__unidentified;s__Thelephoraceae_sp|SH1502338.08FU	1e-109	99.54
OU_133	OU989186	TACTCTCACACTCCCAATACTTTTGGATTGGGAGCGGTGGACTTGGGTGTTGCTGCTTTACTGTGGCTCACCTCAAATGGAGTAGTGCAACTCTCGGTTGGACATAGTACGGCGTGATAAGTGTCTTCGCCGGCGCCTCATTAGAGGGTGGCCGATCGGGAGCTCTGTGCTTCAAACCGTCTTCGGACAACATCTGACA	Fungi	Basidiomycota	Agaricomycetes	Sebacinales	Sebacinaceae	Sebacina	sebacina	HQ154331|k__Fungi;p__Basidiomycota;c__Agaricomycetes;o__Sebacinales;f__Sebacinaceae;g__Sebacina;s__Sebacina_sp|SH1521286.08FU	8e-101	100
OU_134	OU989187	AGCAAATCTCAAAGTCAATTCCTTTTAATTTGGTTTTGCTTTGGACTTGGAGGTCTTGCAGATTTCACAGTCTGCTCCTCTTAAATGCATTAGCTGGATCTCAGTCTTATGCTTGGTTCCACTCGGTGTGATAAGTATCACTCGCTGAGGACACTGTTAAAAAGGTGGCCAGGAAAATACTGATTGAACCGCTTCTAATCGTCCCTTAA	Fungi	Basidiomycota	Agaricomycetes	Cantharellales	Ceratobasidiaceae	_	ceratobasidium1	KU931539|k__Fungi;p__Basidiomycota;c__Agaricomycetes;o__Cantharellales;f__Ceratobasidiaceae;g__unidentified;s__Fungi_sp|SH1176811.08FU	1e-98	97.64
OU_135	OU989188	AACTTCTCAACCACATACATTGTCGGTGATGTGGCTTGGATGGTGGGGGTTTTCTCTGCAGGCCCTTCTTGTCTGCTCCCCTGAAATGCATTAGCGGTATCTGAGCTGCTGCTGTAGGTGTGATAAATCTATCTATGCCTCTGGTCTGCTGCATGAGCAGATTGCACCGCTTCAAACGATGTAACAACCTGACGA	Fungi	Basidiomycota	Agaricomycetes	Agaricales	Inocybaceae	Inocybe	inocybe	JX630697|k__Fungi;p__Basidiomycota;c__Agaricomycetes;o__Agaricales;f__Inocybaceae;g__Inocybe;s__Inocybe_sp|SH1557937.08FU	1e-83	95.88
OU_136	OU989189	TACTCTCACACTTCCAATCTTTGGATTGGGAGCGGTGGACTTGGGTGTTGCTGCTTACTGTGGCTCACCTCAAATCGATTCGTGCACCTCTTGGTTGGACATAGTACGGCGTGATAAGTGTCTTCGCCGGCACCTCAGTAGAGGGTGGCTGATCAGGGCTCTGTGCTTTCCAACTGTCTTCAGACAACAACTGACA	Fungi	Basidiomycota	Agaricomycetes	Sebacinales	Sebacinaceae	Sebacina	sebacina	JQ318659|k__Fungi;p__Basidiomycota;c__Agaricomycetes;o__Sebacinales;f__Sebacinaceae;g__Sebacina;s__Sebacina_sp|SH1561874.08FU	2e-87	96.45
OU_137	OU989190	TACTCTCACACTTCCGATCTTGCATTGGGAGCGGTGGACTTGGGTTTGCTGCTTTACCGTAGCTTACCTCAAATGGGTTAGTGCAGCTCTTGGTTGGACATAGTACGGCGTGATAAGTATCTTCGCTGGTGCCTCGCAAGAGGGTGGCCGATCGGGAGCTCTGTGCTTTCAAACCGTCTTCGGACAATTTCTGACA	Fungi	Basidiomycota	Agaricomycetes	Sebacinales	Sebacinaceae	Sebacina	sebacina	KX510022|k__Fungi;p__Basidiomycota;c__Agaricomycetes;o__Sebacinales;f__Sebacinaceae;g__Sebacina;s__Sebacina_sp|SH1215592.08FU	6e-87	96.89
OU_138	OU989191	TACTCTCACACTCCCGATCTTTGGATTGGGAGTGGTGGACTTGGGTGTTGCTGCTTCACCGTGGCTCACCTCAAATGGAGTAGTGCAACTCTTGGTTGGACATAGTACGGCGTGATAAGTGTCTTCGCCGGCACCTCACTAGAGGGTGGCTGATCAGGAGCTCTGTGCTTCAAACCGTCTTCGGACAACTACTGACA	Fungi	Basidiomycota	Agaricomycetes	Sebacinales	Sebacinaceae	Sebacina	sebacina	AB506901|k__Fungi;p__Basidiomycota;c__Agaricomycetes;o__Sebacinales;f__Sebacinaceae;g__Sebacina;s__Sebacina_sp|SH1513281.08FU	5e-88	96.45
OU_139	OU989192	ACACCTCAACTCTTGTGGTTCGCCATGAAGAGCTTGGACTTGGGGGCTTGCTGGCGCACAGCCGGCTCCTCTCAAATGAATTAGCCTGCCAGTGTTTGGTGGCGTCACGGGTGTGATAACTATTTACGCTTGTGGTTGCCTGCCAGGTAACCTTCGGTGACGGAGGTTCGCTGGAGCTTATAAACGTCTTTCCTTGGTGAAGACAGCTTTTTGAAC	Fungi	Basidiomycota	Agaricomycetes	Thelephorales	Thelephoraceae	_	tomentella-thelephora	MG761543|k__Fungi;p__Basidiomycota;c__Agaricomycetes;o__Thelephorales;f__Thelephoraceae;g__unidentified;s__Fungi_sp|SH1502202.08FU	3e-110	100
OU_140	OU989193	AACAAATTCAAGCTTCTTTTAATCTTTTTGCTTGGTCTTGAGGGATGAGCAAGACGAAATTGAAATTTTTTAAATTTTTGTTCTATTTTGCTCACCCATCGAATTTCAGTGGCGGATTTAACCATAGTTGGCCCGGTGTGATACGTTTTTCATGTCACTGGTCCAGCTTGTGGCAACCTCCTGTCAATAGAAACTCCCCTTGAATATATTATTATT	Fungi	Ascomycota	Pezizomycetes	Pezizales	Pyronemataceae	Rhodoscypha	rhodoscypha	EU597015|k__Fungi;p__Ascomycota;c__Pezizomycetes;o__Pezizales;f__Pyronemataceae;g__Rhodoscypha;s__Rhodoscypha_sp|SH1546041.08FU	4e-69	89.25
OU_141	OU989194	AATCATCAACCCCACCGATTTGTTTCGGCTTGGGGCTTGGACTTGGAGCGTGCTGGCGAAGGTCGGCTCCTCTTTAAATGCATCAGCGGAAGAACGCATCTTTTTTCCCTTCAGCGTGATAATCCTGTTGCGCTGTGTGTGGGTCAAAGGTGTTCCGCTTATAATCGTCCTTCGGACAAACGAACCCATCTAT	Fungi	Basidiomycota	Agaricomycetes	Atheliales	Atheliaceae	Amphinema	amphinema-tylospora	AB669637|k__Fungi;p__Basidiomycota;c__Agaricomycetes;o__Atheliales;f__Atheliaceae;g__Amphinema;s__Amphinema_sp|SH1648326.08FU	2e-97	100
OU_142	OU989195	TAATCTCACTACAACCGCCTTTTTGCTGTTGTATGTGGACTTGGGTGTTGCCGTGTAACAAACGGCTCATCTGAAATGCCTGAGTATACCCTGCTTTGCGGCGTATTCGGTGTGATAAATCTTCACTGGAGTTGACCCTTGGGTCACGTCCGCTTGACATGGCTCTATGCTTCCAACCGTCCTGACAAGACAATCTTTGACA	Fungi	Basidiomycota	Agaricomycetes	Sebacinales	Serendipitaceae	Serendipita	serendipita2	GU452533|k__Fungi;p__Basidiomycota;c__Agaricomycetes;o__Sebacinales;f__Serendipitaceae;g__Serendipita;s__Serendipita_sp|SH1577268.08FU	2e-87	95.54
OU_143	OU989196	AAGTTCTCAACCACATCAAGGTGTGGCTTGGACAGTGGGGGTTTTTGCAGGCTTTTGAAGTCGGCTCCCCTGAAATGCATTAGTGGTGTATCTGCTACTACAGGTGTGATAATTATCTACGCCCTCGGTACGAACAGATCGCATCGCTTCAAAAAACCCACATTTGATGA	Fungi	Basidiomycota	Agaricomycetes	Agaricales	Inocybaceae	Inocybe	inocybe	FJ210735|k__Fungi;p__Basidiomycota;c__Agaricomycetes;o__Agaricales;f__Inocybaceae;g__Inocybe;s__Inocybe_sp|SH1622873.08FU	3e-50	88.44
OU_144	OU989197	TACTCTCACACTTCTGATCCTTTGGATTGGGAGCGGTGGACTTGGGTGCTGCTGCTTACCGGTGGCTCACCTCAAATACATTAGTGCACCTCTTGGTTGGACATAGTACGGCGTGATAAGTGTCTTCGCCGGCACCTCTTGCGAGGGTGGCTGATCAGGAGCTCTGTGCTTCCAACCGTCTGTCTTTCAGACAACAACTGACA	Fungi	Basidiomycota	Agaricomycetes	Sebacinales	Sebacinaceae	Sebacina	sebacina	AB848601|k__Fungi;p__Basidiomycota;c__Agaricomycetes;o__Sebacinales;f__Sebacinaceae;g__Sebacina;s__Sebacina_sp|SH1183665.08FU	1e-88	96.06
OU_145	OU989198	AGTTCTCAACCATACCTCGGTGTGGCTTGGATCTGGGGGGTTTTGCAGGCTTCAAGGAAAGTCGGCTCCCCTGAAAAGCATTAGCGGTGTCCGAGTACCTTTGGTGTGATAACTATCTATGCCTTGGTGTATACGATGCATGCTGCTTCTGAACTTGCGTCTTGCGCATTTTGTTGACAT	Fungi	Basidiomycota	Agaricomycetes	Agaricales	Inocybaceae	Inocybe	inocybe	UDB026290|k__Fungi;p__Basidiomycota;c__Agaricomycetes;o__Agaricales;f__Inocybaceae;g__Inocybe;s__Inocybe_sp|SH1628291.08FU	5e-83	97.77
OU_146	OU989199	AAATCAACTCAAGCACTTTTGCGTGGTCATGGAGGAAGAGCCTGCCTTGTTGCGGTGTCTCCCCTCCCAAAATCAACGGCGGAAAGTCACTGGCACTCGGCGTAGTAGTATCATTCGCCGATCATCCAGTGTCCTTCCTGCCGCCAAACCCCCACAATTCTCTC	Fungi	Ascomycota	Pezizomycetes	Pezizales	Pyronemataceae	Geopora	geopora	LC013727|k__Fungi;p__Ascomycota;c__Pezizomycetes;o__Pezizales;f__Pyronemataceae;g__Geopora;s__Geopora_sp|SH1637483.08FU	2e-81	100
OU_147	OU989200	AATTCTCAACCTTTTCAGCTTTTTCTGTTGATCAGGCTTGGATGTGGGAGTATGCGGGCTTCTCATCTCAGAGGTCGGCTCTCCTGAAATGCATTAGCGGGACCTTTGTTGCCTGGCTTTGGTGTGATAAATTATTTACGCCATCGTGAAGAGCAGCTTTATAAACGGGGTTCAGCTTCTAAATGGTCTCCTTTAAGACCAACTTCTGACA	Fungi	Basidiomycota	Agaricomycetes	Agaricales	Tricholomataceae	Tricholoma	tricholoma	UDB036390|k__Fungi;p__Basidiomycota;c__Agaricomycetes;o__Agaricales;f__Tricholomataceae;g__Tricholoma;s__Tricholoma_terreum|SH1647743.08FU	2e-107	100
OU_148	OU989201	ACACCTCAACTCTCATGGTCCGCCATGATGAGCTTGGACTTTGGGGGCCTTGCCGGCCTAGCGTCGGCTCCTCTCAAATAGATCAGCTTGCCAGTGTTTGGTGGCGTCACAGGTGTGATAACTATCTACGCATGTGGTTCTCCGCCATGTAACCTTCAGTGATGGAGGTTCGCTGGAGCTCACAGATGTCTCTCCTTGGGAGGACAGCTTTTGAAC	Fungi	Basidiomycota	Agaricomycetes	Thelephorales	Thelephoraceae	_	tomentella-thelephora	KX510033|k__Fungi;p__Basidiomycota;c__Agaricomycetes;o__Thelephorales;f__Thelephoraceae;g__unidentified;s__Thelephoraceae_sp|SH1502214.08FU	7e-107	100
OU_149	OU989202	AATACCACTCAGGCTCTTCTGCTTGGTCATGGAAGAAGAGTATGCTTGCATCCTCTCTTCTGAAATCGAATGGCGGACCGCCTCATGTGCCTCGCGTAGTAAGTTCATCCTTTCGCTTGGAGCGTGAGACAGTCTCGCCATCAACCCCCATACTTCTAA	Fungi	Ascomycota	Pezizomycetes	Pezizales	Pyronemataceae	Wilcoxina	wilcoxina	EF434053|k__Fungi;p__Ascomycota;c__Pezizomycetes;o__Pezizales;f__Pyronemataceae;g__Wilcoxina;s__Wilcoxina_rehmii|SH1557656.08FU	2e-75	98.74
OU_150	OU989203	AATTCTCAACCCCTCTCGATTTGCTTCGAAAGGGTGCTTGGATAGTGGGGGCTGCCGGAGATCTGGACTTCTCGTCTAGGACTCGGGCTCCCCTGAAATGAATGGGCTTGCGGTCGACTTTCGACTATGCATGACAAGGCTTTTGGCGTGATAATGATCGCCGCTCGCCGAAGTGCATGAATGAACGGTCCCGTGCCTCTAATGCGTCGATGCCTTCTGGCGTCTTCCTTATTGAC	Fungi	Basidiomycota	Agaricomycetes	Boletales	Suillaceae	Suillus	suillus-rhizopogon	KT964686|k__Fungi;p__Basidiomycota;c__Agaricomycetes;o__Boletales;f__Suillaceae;g__Suillus;s__Suillus_grevillei|SH1555179.08FU	3e-121	100
OU_151	OU989204	TACAATTATCAAACCACTTGACGGTGGCTTTGAATGTGGGGGACTATTTTTTGCAGGCTTTTATCCTCAAGTCTGCTCCCCTGAAATAAATTAGTGGTGTCTGGAGTGGAAACCGCCAGGTGTGATAATCTATCGTCTACACATTTGGGTATGCCACATGAAAACAGATTGTGCTGCTTCCAACGCAACCTGACCCTTTATGACAA	Fungi	Basidiomycota	Agaricomycetes	Agaricales	Inocybaceae	Inocybe	inocybe	KC791072|k__Fungi;p__Basidiomycota;c__Agaricomycetes;o__Agaricales;f__Inocybaceae;g__Inocybe;s__Inocybe_sp|SH1174126.08FU	4e-79	93.14
OU_152	OU989205	TACTCTCACACTTCCGATCTTTGGATTGGGAGTGGTGGACTTGGGTGTTGCTGCTTTACTGTGGCTCGCCTCAAATGGAGTAGTGCAACTCTTGGTTGGACATAGTACGGCGTGATAAGTGTCTTCGCCGGCACCTCACTAGAGGGTGGCTGATCAGGAGCTCTGTGCTTCAAACCGTCTTCGGACAACATCTGACA	Fungi	Basidiomycota	Agaricomycetes	Sebacinales	Sebacinaceae	Sebacina	sebacina	JX630611|k__Fungi;p__Basidiomycota;c__Agaricomycetes;o__Sebacinales;f__Sebacinaceae;g__Sebacina;s__Sebacina_sp|SH1561879.08FU	3e-90	96.98
OU_153	OU989206	TACTCTCACACTCTCTGATCCTTTGGATTTGGGGAGCGGTGGACTTGGGTGCTTGCTGCTTCCTTGTGGCTCACCTGAAATGCATCAGTGCATCTCTTGATTAGACATAGTACGGCGTGATAAGTGTCTTCGCCGGCACCTCATAAGAGGGTGGCTGATCAGGAGCTCTGTGCTTTCAAACTGTCTTTGGACAACCCCTGACA	Fungi	Basidiomycota	Agaricomycetes	Sebacinales	Sebacinaceae	_	sebacina	AJ893260|k__Fungi;p__Basidiomycota;c__Agaricomycetes;o__Sebacinales;f__Sebacinaceae;g__unidentified;s__Sebacinaceae_sp|SH1561864.08FU	4e-94	97.54
OU_154	OU989207	ACACCTCAACTCTTCATGGTTTTCCTTGATGAGCTTGGACTTTGGGGGTCTTGCTGGCCTGTGGGTCGGCTCCCCTCAAATGAATCAGCTTGCCAGTGTTTTGGTGGCATCACAGGTGTGATAACTATCTATACTTGTGGTTTTCCACCAAGTAACCTTCAGCAATGGGGGTTCGCTGGAGCTCACAAACGTCTCTCATCAGTGGGGGACAGCCCTTTGAAC	Fungi	Basidiomycota	Agaricomycetes	Thelephorales	Thelephoraceae	Tomentella	tomentella-thelephora	KT353056|k__Fungi;p__Basidiomycota;c__Agaricomycetes;o__Thelephorales;f__Thelephoraceae;g__Tomentella;s__Tomentella_sp|SH1502782.08FU	2e-113	100
OU_155	OU989208	TACTCTCACACTCCCACTCTTTTGGAGCGGGAGCGGTGGACTTGGGTGTTGCTGCTTTGCGGTGGCTCACCTCAAATGGAGTAGTGCAACTCTCGGTTGGACATAGTACGGCGTGATAAGTGTCTTCGCCGGCGCCTCACTTGAGGGTGGCCGATCGGGAGCTCTGTGCTTCCAACCGTCTTCGGACAATCTCTGACA	Fungi	Basidiomycota	Agaricomycetes	Sebacinales	Sebacinaceae	_	sebacina	KY684557|k__Fungi;p__Basidiomycota;c__Agaricomycetes;o__Sebacinales;f__Sebacinaceae;g__unidentified;s__Sebacinaceae_sp|SH1562072.08FU	3e-90	96.97
OU_156	OU989209	ATATATATCAACCCTCTCTCTTGTAGTGAGTGGTTTGGATGTGGGGGTTTTGCTGGCCTCTTTGAAAAAAGGGCTCAGCTCTCCTGAAATGCATTAGCAGAACAAACCTGTTCATTGGTGTGATAACTATCTGCGCCATTGAATGTGAGGGGCAGTTCAGCTTTCTAACAGTCCTTCGTTGGACAATTCATCATTA	Fungi	Basidiomycota	Agaricomycetes	Agaricales	Cortinariaceae	Cortinarius	cortinarius	KX355528|k__Fungi;p__Basidiomycota;c__Agaricomycetes;o__Agaricales;f__Cortinariaceae;g__Cortinarius;s__Cortinarius_helobius|SH1545246.08FU	4e-99	100
OU_157	OU989210	TAACCCCTCAAGCCTAGCTTGGTGTTGGGGCCTGCCGCACCGGCAGCCCTTAAAATCAGTGGCGGCGCCGTCGGGCTCTAAGCGTAGTAATTCTTCTCGCTATAGAGTCCTGGTGGATGCTAGCCATAACCCCCAACTTTCTAT	Fungi	Ascomycota	Leotiomycetes	Helotiales	_	_	helotiales1	KF617798|k__Fungi;p__Ascomycota;c__Leotiomycetes;o__Helotiales;f__unidentified;g__unidentified;s__Helotiales_sp|SH1564482.08FU	3e-54	93.15
OU_158	OU989211	AATTCTCAACCCCTCTCGATTTGCTTCGAGTGGGGCTTGGATAGTGGGGGCTGCCGGAGACCTGGAATTCATTCTGGGACTCGGGCTCCTCTGAAATGCATTGGCTTGCGGTCGACTTTCGACTTTGCGCGACAAAGCTTTCGGCGTGATAATGATCGCCGTTCGCTGAAGCGCATGAACGAATGGTCCCGTGCCTCTAATCAGTCGACGCCTTCTGGGCGTCTTCCTTATAGAC	Fungi	Basidiomycota	Agaricomycetes	Boletales	Suillaceae	Suillus	suillus-rhizopogon	KU663194|k__Fungi;p__Basidiomycota;c__Agaricomycetes;o__Boletales;f__Suillaceae;g__Suillus;s__Suillus_americanus|SH1555174.08FU	2e-117	99.15
OU_159	OU989212	TACTCTCACACTTCCGATCTTTGGATTGGGAGCGGTGGACTTGGGTGTTGCTGCTTTACTGTGGCTCGCCTCAAATGGAGTAGTGCAACTCTTGGTTGGACATAGTACGGCGTGATAAGTGTCTTCGCCGGCACCTCACTAGAGGGTGGCCGATCGGGATGTTGTGCTCCAAACCGTCTTCGGACAATCTCTGACA	Fungi	Basidiomycota	Agaricomycetes	Sebacinales	Sebacinaceae	Sebacina	sebacina	KM576578|k__Fungi;p__Basidiomycota;c__Agaricomycetes;o__Sebacinales;f__Sebacinaceae;g__Sebacina;s__Sebacina_sp|SH1521320.08FU	1e-79	93.97
OU_160	OU989213	TACTCTCACACTTCCGATCTTGCATTGGGAGCGGTGGACTTGGGTTTGCTGCTTTACCGTAGCTTACCTCAAATGGGTTAGTGCAGCTCTTGGTTGGACATAGTACGGCGTGATAAGTATCTTCGCCGGCACCTCACTAGAGGGTGGCTGATCAGGAGCTCTGTGCTTCAAACCGTCTTCGGACAACATCTGACA	Fungi	Basidiomycota	Agaricomycetes	Sebacinales	Sebacinaceae	Sebacina	sebacina	KX619533|k__Fungi;p__Basidiomycota;c__Agaricomycetes;o__Sebacinales;f__Sebacinaceae;g__Sebacina;s__Sebacina_sp|SH1615390.08FU	3e-75	92.86
OU_161	OU989214	GACCTTCTCAACCACATCATTTGTGTGTGGCTTGGATGTGGGGGAAACAATTGCAGGCTTTCAATCGAAAAAGCCGGCTCCCCTGAAATGCATTAGTGGTGTCTGAGCTGCTATTGGTGTGATAAATTATCTATGCCTTTGGTGATGCTGGTCAGCACTGCTTATAACGGATGGCTAAATCATTTGACAA	Fungi	Basidiomycota	Agaricomycetes	Agaricales	Inocybaceae	Inocybe	inocybe	MG367268|k__Fungi;p__Basidiomycota;c__Agaricomycetes;o__Agaricales;f__Inocybaceae;g__Inocybe;s__Inocybe_geophylla|SH1611233.08FU	8e-96	100
OU_162	OU989215	CACCACTTAAGCCTGGCTTAGTGTTGGGCGACGTCCCCTTTAGGGACGCGCCTCGAAACGCTTGGCGGTGTGGTACTGGCTTTAAGCGTAGTAGAATCTTTCGCTTTGGAAGTCGGGGCCCCATCTGCTAAAAGACCTACTCGCAA	Fungi	Ascomycota	Dothideomycetes		_	_	cenococcum	EF635777|k__Fungi;p__Ascomycota;c__Dothideomycetes;o__unidentified;f__unidentified;g__unidentified;s__Dothideomycetes_sp|SH1639590.08FU	4e-53	92.47
OU_163	OU989216	AAACCTACTCAAGTAGTTTACTTGGAAGTGAAGGAAGAATACTTTTTAAATAAAGAGTTCTCCTTTGAAATTGATTAGCAGATGGTATAAAATCCTGATGTTGCAAGATTTTTTATCTTTCGAAGGTGATTTTATTATCTTGCTTCAAATCCATTTATTGGCATATATATTATAGTTATGTTTGTTTTCAAATATACTAAATATTGTTGACAGTAAATAATTTATTTATA	Fungi	Ascomycota	Pezizomycetes	Pezizales	Pyronemataceae	Trichophaea	awilcoxina	KF000553|k__Fungi;p__Ascomycota;c__Pezizomycetes;o__Pezizales;f__Pyronemataceae;g__Trichophaea;s__Trichophaea_sp|SH1524846.08FU	3e-116	99.57
OU_164	OU989217	AATTCTCAACCACACCTGGTGTGGCTTGGATTTGGGTTGTTGTGGGCTTTTTTGTAGTCTGCTCCCCTGAAATTGATTAGCGGTACCTTGGTGGAACTGTCTACAGGTGTGATAATTATCTACATCCTAGACATCTGCTGGAATGCTGCTTTCTAAACCTTACTTGTA	Fungi	Basidiomycota	Agaricomycetes	Agaricales	Inocybaceae	Inocybe	inocybe	MH734760|k__Fungi;p__Basidiomycota;c__Agaricomycetes;o__Agaricales;f__Inocybaceae;g__Inocybe;s__Inocybe_sp|SH1563631.08FU	3e-80	98.82
OU_165	OU989218	AAACTCTCAAACCACATCATTCATTTGACGTGGCTTTGGACGTGGGGGTTGCCGGCTTTCTTCTCAGAGAGGCCTGCTCCTCTGAAATGCATTAGTGGTATCTGAAGTGGAAAAACCGCTAGGTGTGATAATACTGTCTATGCCTTTGGTTTATGCCGCATATGCTGCTTCCAACCGCACATTTTTGACAA	Fungi	Basidiomycota	Agaricomycetes	Agaricales	Inocybaceae	Inocybe	inocybe	KJ173911|k__Fungi;p__Basidiomycota;c__Agaricomycetes;o__Agaricales;f__Inocybaceae;g__Inocybe;s__Inocybe_sp|SH1547269.08FU	5e-93	98.95
OU_166	OU989219	TACTCTCACACTCCCAATTTTTTGGATTGGGAGTGGTGGACTTGGGTGTTGCTGCTTTACGGTGGCTCACCTCAAATGGAGTAGTGCAACTCTTGGTTGGACATAGTACGGCATGATAAGTGTCTTCGCCAGTGCCTCACTTAGAGGGTGGCTGATCGGGAGCTCTGTGCTTCTAACCGTCTTTGGACAATCTCTGACA	Fungi	Basidiomycota	Agaricomycetes	Sebacinales	Sebacinaceae	Sebacina	sebacina	JX630493|k__Fungi;p__Basidiomycota;c__Agaricomycetes;o__Sebacinales;f__Sebacinaceae;g__Sebacina;s__Sebacina_sp|SH1561881.08FU	2e-87	95.98
